# Supplementary material for: Identification of COVID-19-Specific Immune Markers Using a Machine Learning Method
Source: Front Mol Biosci. 2022 Jul 19;9:952626. doi: 10.3389/fmolb.2022.952626 (PMC9344575; doi:10.3389/fmolb.2022.952626)
Supplement: Supplementary file 3 [file Table4.XLSX]

## Sheet: B cell_GO
ONTOLOGY	ID	Description	GeneRatio	BgRatio	pvalue	p.adjust	qvalue	geneID	Count
BP	GO:0045047	protein targeting to ER	22/108	120/18862	1.96708e-27	2.76436e-24	2.31698e-24	6189/6192/6224/6194/6128/4736/6124/23521/6122/6187/6139/6155/6181/3309/6191/3921/6205/6173/6231/6201/6167/6193	22
BP	GO:0072599	establishment of protein localization to endoplasmic reticulum	22/108	124/18862	4.2668e-27	2.76436e-24	2.31698e-24	6189/6192/6224/6194/6128/4736/6124/23521/6122/6187/6139/6155/6181/3309/6191/3921/6205/6173/6231/6201/6167/6193	22
BP	GO:0006614	SRP-dependent cotranslational protein targeting to membrane	21/108	105/18862	4.56667e-27	2.76436e-24	2.31698e-24	6189/6192/6224/6194/6128/4736/6124/23521/6122/6187/6139/6155/6181/6191/3921/6205/6173/6231/6201/6167/6193	21
BP	GO:0019080	viral gene expression	25/108	198/18862	7.27759e-27	3.30403e-24	2.76932e-24	6189/6192/6224/6194/6128/4736/51386/10410/6124/23521/6122/6187/6139/6155/3725/6181/6191/3921/7538/6205/6173/6231/6201/6167/6193	25
BP	GO:0070972	protein localization to endoplasmic reticulum	23/108	152/18862	1.27242e-26	3.98621e-24	3.3411e-24	6189/6192/6224/6194/6128/4736/6124/23521/23645/6122/6187/6139/6155/6181/3309/6191/3921/6205/6173/6231/6201/6167/6193	23
BP	GO:0006613	cotranslational protein targeting to membrane	21/108	110/18862	1.31703e-26	3.98621e-24	3.3411e-24	6189/6192/6224/6194/6128/4736/6124/23521/6122/6187/6139/6155/6181/6191/3921/6205/6173/6231/6201/6167/6193	21
BP	GO:0019083	viral transcription	24/108	180/18862	2.18379e-26	5.66538e-24	4.74852e-24	6189/6192/6224/6194/6128/4736/10410/6124/23521/6122/6187/6139/6155/3725/6181/6191/3921/7538/6205/6173/6231/6201/6167/6193	24
BP	GO:0000184	nuclear-transcribed mRNA catabolic process, nonsense-mediated decay	21/108	120/18862	9.38647e-26	2.13073e-23	1.7859e-23	6189/6192/6224/6194/6128/4736/6124/23521/6122/6187/6139/6155/6181/6191/3921/6205/6173/6231/6201/6167/6193	21
BP	GO:0006413	translational initiation	24/108	193/18862	1.23219e-25	2.48628e-23	2.08391e-23	6189/6192/6224/6194/6128/4736/51386/6124/23521/23645/6122/6187/5610/6139/6155/6181/6191/3921/6205/6173/6231/6201/6167/6193	24
BP	GO:0000956	nuclear-transcribed mRNA catabolic process	22/108	208/18862	5.91689e-22	1.07451e-19	9.00613e-20	6189/6192/6224/6194/6128/4736/6124/23521/6122/6187/6139/6155/6181/6191/3921/7538/6205/6173/6231/6201/6167/6193	22
BP	GO:0006612	protein targeting to membrane	22/108	211/18862	8.13829e-22	1.34356e-19	1.12612e-19	6189/6192/6224/6194/6128/4736/6124/23521/6122/6187/6139/6155/6181/3309/6191/3921/6205/6173/6231/6201/6167/6193	22
BP	GO:0006401	RNA catabolic process	24/108	414/18862	9.57702e-18	1.44932e-15	1.21477e-15	6189/6192/6224/6194/3669/6128/4736/5721/6124/23521/6122/6187/6139/6155/6181/6191/3921/7538/6205/6173/6231/6201/6167/6193	24
BP	GO:0006402	mRNA catabolic process	23/108	375/18862	1.45641e-17	2.0345e-15	1.70524e-15	6189/6192/6224/6194/6128/4736/5721/6124/23521/6122/6187/6139/6155/6181/6191/3921/7538/6205/6173/6231/6201/6167/6193	23
BP	GO:0090150	establishment of protein localization to membrane	22/108	354/18862	6.06449e-17	7.86651e-15	6.59342e-15	6189/6192/6224/6194/6128/4736/6124/23521/6122/6187/6139/6155/6181/3309/6191/3921/6205/6173/6231/6201/6167/6193	22
BP	GO:0006605	protein targeting	23/108	441/18862	5.03397e-16	6.09446e-14	5.10816e-14	6189/6192/6224/6194/6128/4736/6124/23521/6122/6187/6139/6155/6181/3309/6191/3921/6205/6173/6231/6201/6167/293/6193	23
BP	GO:0060337	type I interferon signaling pathway	13/108	95/18862	7.99319e-15	9.07227e-13	7.60404e-13	8519/3429/54739/3669/4599/2537/9636/3665/10410/6772/684/10581/3437	13
BP	GO:0071357	cellular response to type I interferon	13/108	96/18862	9.20178e-15	9.82966e-13	8.23887e-13	8519/3429/54739/3669/4599/2537/9636/3665/10410/6772/684/10581/3437	13
BP	GO:0034340	response to type I interferon	13/108	101/18862	1.81727e-14	1.83342e-12	1.53671e-12	8519/3429/54739/3669/4599/2537/9636/3665/10410/6772/684/10581/3437	13
BP	GO:0048525	negative regulation of viral process	12/108	89/18862	1.09127e-13	1.04303e-11	8.74227e-12	8519/3669/4599/4061/9636/10410/6772/684/10581/5610/7538/5359	12
BP	GO:0051607	defense response to virus	16/108	260/18862	1.75839e-12	1.52059e-10	1.2745e-10	8519/10964/3429/3669/4599/2537/9636/3665/10410/6772/684/10581/5610/3437/10346/5359	16
BP	GO:0140546	defense response to symbiont	16/108	260/18862	1.75839e-12	1.52059e-10	1.2745e-10	8519/10964/3429/3669/4599/2537/9636/3665/10410/6772/684/10581/5610/3437/10346/5359	16
BP	GO:0009615	response to virus	18/108	359/18862	2.06265e-12	1.70262e-10	1.42708e-10	8519/10964/3429/3669/4599/1937/2537/9636/3665/10410/6772/7178/684/10581/5610/3437/10346/5359	18
BP	GO:0045071	negative regulation of viral genome replication	9/108	54/18862	2.02207e-11	1.59656e-09	1.33818e-09	8519/3669/4599/9636/10410/684/10581/5610/5359	9
BP	GO:0050792	regulation of viral process	13/108	186/18862	4.97738e-11	3.76622e-09	3.15671e-09	8519/3669/4599/4061/9636/10410/6772/684/10581/5610/10346/7538/5359	13
BP	GO:0043903	regulation of biological process involved in symbiotic interaction	13/108	197/18862	1.02217e-10	7.42504e-09	6.2234e-09	8519/3669/4599/4061/9636/10410/6772/684/10581/5610/10346/7538/5359	13
BP	GO:0019079	viral genome replication	11/108	129/18862	1.95516e-10	1.3656e-08	1.1446e-08	8519/3429/3669/4599/9636/10410/684/10581/5610/5093/5359	11
BP	GO:0002181	cytoplasmic translation	10/108	102/18862	3.40368e-10	2.28929e-08	1.9188e-08	1938/6128/4736/51386/23521/6139/6181/3921/6173/6231	10
BP	GO:0035456	response to interferon-beta	7/108	31/18862	3.89113e-10	2.52368e-08	2.11525e-08	8519/54739/10410/6772/684/10581/5359	7
BP	GO:1903900	regulation of viral life cycle	11/108	148/18862	8.58108e-10	5.37353e-08	4.5039e-08	8519/3669/4599/4061/9636/10410/684/10581/5610/10346/5359	11
BP	GO:0045069	regulation of viral genome replication	9/108	83/18862	1.08939e-09	6.59447e-08	5.52725e-08	8519/3669/4599/9636/10410/684/10581/5610/5359	9
BP	GO:0035455	response to interferon-alpha	6/108	21/18862	1.54967e-09	9.07807e-08	7.60891e-08	8519/10410/684/10581/5610/3437	6
BP	GO:0019058	viral life cycle	14/108	348/18862	1.19222e-08	6.76585e-07	5.67089e-07	8519/3429/3669/4599/4061/9636/10410/684/10581/5610/10346/3921/5093/5359	14
BP	GO:1903901	negative regulation of viral life cycle	5/108	24/18862	2.18495e-07	1.20238e-05	1.00779e-05	8519/4061/10410/684/10581	5
BP	GO:0010038	response to metal ion	12/108	352/18862	8.27984e-07	4.42241e-05	3.7067e-05	6279/2353/1843/84329/3725/811/3309/567/10628/5359/3727/3726	12
BP	GO:0034341	response to interferon-gamma	9/108	197/18862	1.97626e-06	0.00010254	8.59451e-05	8519/3665/10410/6772/23521/684/10581/567/10346	9
BP	GO:0022613	ribonucleoprotein complex biogenesis	13/108	473/18862	3.10274e-06	0.000156516	0.000131186	6194/3669/6128/4736/51386/23521/7919/6122/6187/6155/3921/6201/6193	13
BP	GO:0046596	regulation of viral entry into host cell	5/108	41/18862	3.5655e-06	0.000174999	0.000146678	8519/4061/10410/10581/10346	5
BP	GO:0046597	negative regulation of viral entry into host cell	4/108	20/18862	4.58872e-06	0.000219114	0.000183653	8519/4061/10410/10581	4
BP	GO:0051701	biological process involved in interaction with host	9/108	219/18862	4.70564e-06	0.000219114	0.000183653	8519/4061/10410/7919/10581/5610/10346/3921/5359	9
BP	GO:0052372	modulation by symbiont of entry into host	5/108	48/18862	7.89164e-06	0.000358281	0.000300298	8519/4061/10410/10581/10346	5
BP	GO:0038093	Fc receptor signaling pathway	9/108	239/18862	9.5329e-06	0.000422238	0.000353904	2353/60/5721/71/3514/3725/10093/3500/10552	9
BP	GO:0042254	ribosome biogenesis	10/108	307/18862	1.06824e-05	0.000461887	0.000387137	6194/3669/6128/4736/6122/6187/6155/3921/6201/6193	10
BP	GO:0071248	cellular response to metal ion	8/108	189/18862	1.31228e-05	0.000554211	0.00046452	2353/84329/3725/811/3309/567/3727/3726	8
BP	GO:0046718	viral entry into host cell	7/108	140/18862	1.59449e-05	0.000658089	0.000551586	8519/4061/10410/10581/10346/3921/5359	7
BP	GO:0045637	regulation of myeloid cell differentiation	9/108	258/18862	1.75433e-05	0.000707969	0.000593394	2353/9636/3665/4792/6772/3725/2124/567/7538	9
BP	GO:0002431	Fc receptor mediated stimulatory signaling pathway	7/108	145/18862	2.00199e-05	0.000790351	0.000662443	60/71/3514/10093/5359/3500/10552	7
BP	GO:0036500	ATF6-mediated unfolded protein response	3/108	10/18862	2.12759e-05	0.000822066	0.000689026	811/3309/7494	3
BP	GO:0044409	entry into host	7/108	153/18862	2.83053e-05	0.00105576	0.000884899	8519/4061/10410/10581/10346/3921/5359	7
BP	GO:0030099	myeloid cell differentiation	11/108	419/18862	2.84869e-05	0.00105576	0.000884899	2353/6194/9636/3665/4792/6772/3725/2124/567/7538/3726	11
BP	GO:0002237	response to molecule of bacterial origin	10/108	346/18862	2.9857e-05	0.00108441	0.00090891	6279/2353/4792/6280/3725/567/7538/57162/3727/7494	10
BP	GO:0071353	cellular response to interleukin-4	4/108	32/18862	3.23031e-05	0.00115024	0.000964093	6122/3309/7494/11151	4
BP	GO:0071241	cellular response to inorganic substance	8/108	216/18862	3.42755e-05	0.001197	0.00100329	2353/84329/3725/811/3309/567/3727/3726	8
BP	GO:0070670	response to interleukin-4	4/108	35/18862	4.64181e-05	0.00159048	0.00133308	6122/3309/7494/11151	4
BP	GO:0052126	movement in host environment	7/108	175/18862	6.65798e-05	0.00221564	0.00185707	8519/4061/10410/10581/10346/3921/5359	7
BP	GO:0006909	phagocytosis	10/108	381/18862	6.71036e-05	0.00221564	0.00185707	60/71/3514/811/10093/5359/1535/3500/11151/10552	10
BP	GO:0032496	response to lipopolysaccharide	9/108	326/18862	0.000107582	0.00348872	0.00292411	6279/2353/4792/6280/3725/7538/57162/3727/7494	9
BP	GO:1903706	regulation of hemopoiesis	10/108	415/18862	0.000135597	0.00432007	0.00362093	2353/9636/3665/4792/6772/3725/2124/567/7538/7494	10
BP	GO:0002433	immune response-regulating cell surface receptor signaling pathway involved in phagocytosis	6/108	139/18862	0.000148523	0.00453983	0.00380512	60/71/3514/10093/3500/10552	6
BP	GO:0038096	Fc-gamma receptor signaling pathway involved in phagocytosis	6/108	139/18862	0.000148523	0.00453983	0.00380512	60/71/3514/10093/3500/10552	6
BP	GO:0045646	regulation of erythrocyte differentiation	4/108	47/18862	0.000149995	0.00453983	0.00380512	9636/6772/567/7538	4
BP	GO:0038094	Fc-gamma receptor signaling pathway	6/108	140/18862	0.000154459	0.00459833	0.00385415	60/71/3514/10093/3500/10552	6
BP	GO:0051592	response to calcium ion	6/108	145/18862	0.00018702	0.00547789	0.00459137	2353/1843/3309/10628/3727/3726	6
BP	GO:0051591	response to cAMP	5/108	93/18862	0.000195305	0.00562975	0.00471865	2353/1843/6772/3725/3309	5
BP	GO:0031349	positive regulation of defense response	9/108	361/18862	0.000230807	0.00654916	0.00548927	6279/3665/4792/5721/6280/22914/5359/283131/1535	9
BP	GO:0006984	ER-nucleus signaling pathway	4/108	53/18862	0.000239844	0.00670086	0.00561642	23645/811/3309/7494	4
BP	GO:0002224	toll-like receptor signaling pathway	6/108	157/18862	0.000287464	0.00790962	0.00662956	6279/3665/4792/6280/1535/57162	6
BP	GO:0071676	negative regulation of mononuclear cell migration	3/108	23/18862	0.000297423	0.00802562	0.00672678	1843/22914/9750	3
BP	GO:0045639	positive regulation of myeloid cell differentiation	5/108	102/18862	0.000300519	0.00802562	0.00672678	2353/9636/6772/3725/2124	5
BP	GO:0022618	ribonucleoprotein complex assembly	7/108	224/18862	0.000306318	0.00806194	0.00675723	6128/51386/23521/7919/6122/3921/6193	7
BP	GO:0030595	leukocyte chemotaxis	7/108	226/18862	0.000323233	0.00838558	0.00702849	6279/1843/6280/22914/811/9750/11151	7
BP	GO:0071826	ribonucleoprotein complex subunit organization	7/108	231/18862	0.000368817	0.00943341	0.00790674	6128/51386/23521/7919/6122/3921/6193	7
BP	GO:0002429	immune response-activating cell surface receptor signaling pathway	10/108	481/18862	0.000440504	0.0109583	0.00918484	974/60/5721/71/3514/10093/5359/3500/10552/973	10
BP	GO:0002757	immune response-activating signal transduction	10/108	481/18862	0.000440504	0.0109583	0.00918484	974/60/5721/71/3514/10093/5359/3500/10552/973	10
BP	GO:0042255	ribosome assembly	4/108	64/18862	0.000495901	0.0121697	0.0102002	6128/6122/3921/6193	4
BP	GO:0030218	erythrocyte differentiation	5/108	115/18862	0.000522157	0.0126432	0.010597	6194/9636/6772/567/7538	5
BP	GO:0042113	B cell activation	8/108	326/18862	0.000575269	0.0136159	0.0114123	1316/974/684/3514/57162/7494/3500/973	8
BP	GO:0048872	homeostasis of number of cells	7/108	249/18862	0.000577325	0.0136159	0.0114123	6194/9636/6772/1831/567/7538/11151	7
BP	GO:1900101	regulation of endoplasmic reticulum unfolded protein response	3/108	29/18862	0.000598522	0.0139348	0.0116797	23645/3309/7494	3
BP	GO:0034101	erythrocyte homeostasis	5/108	121/18862	0.00065826	0.0151317	0.0126828	6194/9636/6772/567/7538	5
BP	GO:0002479	antigen processing and presentation of exogenous peptide antigen via MHC class I, TAP-dependent	4/108	75/18862	0.000904025	0.0201561	0.0168941	5721/811/567/1535	4
BP	GO:0042274	ribosomal small subunit biogenesis	4/108	75/18862	0.000904025	0.0201561	0.0168941	6194/3921/6201/6193	4
BP	GO:0046683	response to organophosphorus	5/108	130/18862	0.000910131	0.0201561	0.0168941	2353/1843/6772/3725/3309	5
BP	GO:0042542	response to hydrogen peroxide	5/108	135/18862	0.00107779	0.0234257	0.0196346	1938/1843/3725/388/10628	5
BP	GO:0009612	response to mechanical stimulus	6/108	202/18862	0.00108357	0.0234257	0.0196346	2353/4792/3725/9750/10628/3727	6
BP	GO:0043029	T cell homeostasis	3/108	36/18862	0.001136	0.0240234	0.0201355	6194/1831/11151	3
BP	GO:0001895	retina homeostasis	4/108	80/18862	0.0011509	0.0240234	0.0201355	60/71/3514/567	4
BP	GO:0042590	antigen processing and presentation of exogenous peptide antigen via MHC class I	4/108	80/18862	0.0011509	0.0240234	0.0201355	5721/811/567/1535	4
BP	GO:0097193	intrinsic apoptotic signaling pathway	7/108	283/18862	0.00121989	0.025174	0.0210999	6279/2537/6280/23645/7178/7494/6201	7
BP	GO:0002221	pattern recognition receptor signaling pathway	6/108	208/18862	0.00125925	0.0254582	0.0213381	6279/3665/4792/6280/1535/57162	6
BP	GO:0071277	cellular response to calcium ion	4/108	82/18862	0.00126169	0.0254582	0.0213381	2353/3309/3727/3726	4
BP	GO:0051651	maintenance of location in cell	6/108	209/18862	0.00129054	0.025754	0.0215861	6279/6280/400916/811/3309/11151	6
BP	GO:0014074	response to purine-containing compound	5/108	144/18862	0.00143592	0.0283438	0.0237567	2353/1843/6772/3725/3309	5
BP	GO:0002262	myeloid cell homeostasis	5/108	145/18862	0.00148052	0.02891	0.0242313	6194/9636/6772/567/7538	5
BP	GO:0048013	ephrin receptor signaling pathway	4/108	86/18862	0.0015053	0.0290811	0.0243747	60/71/10093/10552	4
BP	GO:0042110	T cell activation	9/108	474/18862	0.0016092	0.030761	0.0257828	6194/896/22914/911/567/9750/57162/7494/11151	9
BP	GO:0034975	protein folding in endoplasmic reticulum	2/108	11/18862	0.00172731	0.0320081	0.026828	811/3309	2
BP	GO:0098974	postsynaptic actin cytoskeleton organization	2/108	11/18862	0.00172731	0.0320081	0.026828	60/71	2
BP	GO:1903897	regulation of PERK-mediated unfolded protein response	2/108	11/18862	0.00172731	0.0320081	0.026828	23645/3309	2
BP	GO:0000302	response to reactive oxygen species	6/108	224/18862	0.00183496	0.0336594	0.0282121	2353/1938/1843/3725/388/10628	6
BP	GO:0060333	interferon-gamma-mediated signaling pathway	4/108	91/18862	0.00185363	0.033662	0.0282143	3665/6772/567/10346	4
BP	GO:0043312	neutrophil degranulation	9/108	485/18862	0.0018816	0.0338316	0.0283564	6279/1938/1915/6280/684/84329/567/1535/11010	9
BP	GO:0060326	cell chemotaxis	7/108	306/18862	0.00190515	0.0339191	0.0284297	6279/1843/6280/22914/811/9750/11151	7
BP	GO:0002283	neutrophil activation involved in immune response	9/108	488/18862	0.00196198	0.0345917	0.0289935	6279/1938/1915/6280/684/84329/567/1535/11010	9
BP	GO:0006364	rRNA processing	6/108	228/18862	0.00200588	0.0350257	0.0293573	6194/3669/4736/6187/6155/6201	6
BP	GO:1903573	negative regulation of response to endoplasmic reticulum stress	3/108	44/18862	0.0020384	0.0352546	0.0295492	23645/3309/7494	3
BP	GO:2001242	regulation of intrinsic apoptotic signaling pathway	5/108	160/18862	0.00227899	0.0386042	0.0323566	6279/6280/7178/7494/6201	5
BP	GO:0002446	neutrophil mediated immunity	9/108	499/18862	0.00228052	0.0386042	0.0323566	6279/1938/1915/6280/684/84329/567/1535/11010	9
BP	GO:0042119	neutrophil activation	9/108	500/18862	0.00231142	0.0386042	0.0323566	6279/1938/1915/6280/684/84329/567/1535/11010	9
BP	GO:0002686	negative regulation of leukocyte migration	3/108	46/18862	0.0023171	0.0386042	0.0323566	1843/22914/9750	3
BP	GO:0030838	positive regulation of actin filament polymerization	4/108	97/18862	0.00234097	0.0386472	0.0323927	10093/51429/11151/10552	4
BP	GO:0051235	maintenance of location	7/108	319/18862	0.00240684	0.0390744	0.0327507	6279/4792/6280/400916/811/3309/11151	7
BP	GO:0070486	leukocyte aggregation	2/108	13/18862	0.00243139	0.0390744	0.0327507	6279/6280	2
BP	GO:0099188	postsynaptic cytoskeleton organization	2/108	13/18862	0.00243139	0.0390744	0.0327507	60/71	2
BP	GO:0016072	rRNA metabolic process	6/108	238/18862	0.0024859	0.0394708	0.033083	6194/3669/4736/6187/6155/6201	6
BP	GO:1903131	mononuclear cell differentiation	8/108	411/18862	0.00251005	0.0394708	0.033083	1316/6194/974/3665/3725/567/7494/973	8
BP	GO:0002474	antigen processing and presentation of peptide antigen via MHC class I	4/108	99/18862	0.00252126	0.0394708	0.033083	5721/811/567/1535	4
BP	GO:1990090	cellular response to nerve growth factor stimulus	3/108	48/18862	0.00261832	0.0406399	0.0340629	1938/3309/11151	3
BP	GO:0035967	cellular response to topologically incorrect protein	5/108	168/18862	0.00281449	0.0427675	0.0358462	23645/811/3309/7494/55284	5
BP	GO:0002475	antigen processing and presentation via MHC class Ib	2/108	14/18862	0.00282605	0.0427675	0.0358462	911/567	2
BP	GO:1900102	negative regulation of endoplasmic reticulum unfolded protein response	2/108	14/18862	0.00282605	0.0427675	0.0358462	23645/3309	2
BP	GO:0030336	negative regulation of cell migration	7/108	330/18862	0.00290619	0.0436169	0.0365581	8519/1843/22914/684/811/388/9750	7
BP	GO:1990089	response to nerve growth factor	3/108	50/18862	0.00294265	0.0438021	0.0367133	1938/3309/11151	3
BP	GO:0006417	regulation of translation	8/108	425/18862	0.00308038	0.0454794	0.0381192	1938/23521/23645/7919/5610/811/6191/7538	8
BP	GO:0032897	negative regulation of viral transcription	2/108	15/18862	0.00324867	0.0468221	0.0392446	10410/7538	2
BP	GO:0043558	regulation of translational initiation in response to stress	2/108	15/18862	0.00324867	0.0468221	0.0392446	23645/5610	2
BP	GO:2000402	negative regulation of lymphocyte migration	2/108	15/18862	0.00324867	0.0468221	0.0392446	22914/9750	2
BP	GO:0045010	actin nucleation	3/108	52/18862	0.00329066	0.0470538	0.0394388	10093/11151/10552	3
BP	GO:0071346	cellular response to interferon-gamma	5/108	177/18862	0.0035198	0.0499371	0.0418555	3665/6772/23521/567/10346	5
CC	GO:0022626	cytosolic ribosome	22/113	107/19520	1.79805e-28	4.08158e-26	3.50147e-26	6189/6192/6224/6194/6128/9636/4736/6124/23521/6122/6187/6139/6155/6181/6191/3921/6205/6173/6231/6201/6167/6193	22
CC	GO:0005840	ribosome	24/113	243/19520	4.98499e-23	5.65796e-21	4.85381e-21	6189/6192/6224/6194/1938/6128/9636/4736/6124/23521/6122/6187/5610/6139/6155/6181/6191/3921/6205/6173/6231/6201/6167/6193	24
CC	GO:0044391	ribosomal subunit	22/113	187/19520	7.61897e-23	5.76502e-21	4.94565e-21	6189/6192/6224/6194/6128/9636/4736/6124/23521/6122/6187/6139/6155/6181/6191/3921/6205/6173/6231/6201/6167/6193	22
CC	GO:0022627	cytosolic small ribosomal subunit	12/113	46/19520	2.56585e-17	1.45612e-15	1.24916e-15	6189/6192/6224/6194/9636/6187/6191/3921/6205/6231/6201/6193	12
CC	GO:0015935	small ribosomal subunit	12/113	74/19520	1.26525e-14	5.74422e-13	4.9278e-13	6189/6192/6224/6194/9636/6187/6191/3921/6205/6231/6201/6193	12
CC	GO:0005925	focal adhesion	20/113	416/19520	3.05682e-13	1.1565e-11	9.92125e-12	6189/6128/4736/60/6124/71/23521/6122/6187/6155/811/6181/3309/388/567/6191/6205/51056/6201/6193	20
CC	GO:0030055	cell-substrate junction	20/113	423/19520	4.16435e-13	1.35044e-11	1.1585e-11	6189/6128/4736/60/6124/71/23521/6122/6187/6155/811/6181/3309/388/567/6191/6205/51056/6201/6193	20
CC	GO:0022625	cytosolic large ribosomal subunit	10/113	57/19520	9.68448e-13	2.74797e-11	2.35741e-11	6128/4736/6124/23521/6122/6139/6155/6181/6173/6167	10
CC	GO:0005844	polysome	9/113	68/19520	1.95743e-10	4.93708e-09	4.23538e-09	6192/6194/1938/6128/4736/811/6191/6173/6231	9
CC	GO:0015934	large ribosomal subunit	10/113	115/19520	1.26451e-09	2.87043e-08	2.46246e-08	6128/4736/6124/23521/6122/6139/6155/6181/6173/6167	10
CC	GO:0042788	polysomal ribosome	5/113	32/19520	1.05713e-06	2.18154e-05	1.87148e-05	1938/6128/4736/6173/6231	5
CC	GO:0030670	phagocytic vesicle membrane	5/113	77/19520	8.43203e-05	0.00159506	0.00136836	84329/811/567/1535/11151	5
CC	GO:0009897	external side of plasma membrane	9/113	402/19520	0.000551969	0.00963823	0.00826836	974/22914/3514/911/811/567/969/3500/973	9
CC	GO:0005791	rough endoplasmic reticulum	4/113	75/19520	0.000943201	0.0152933	0.0131197	6128/6124/6155/6231	4
CC	GO:0045335	phagocytic vesicle	5/113	136/19520	0.00117254	0.0177444	0.0152224	84329/811/567/1535/11151	5
CC	GO:0005751	mitochondrial respiratory chain complex IV	2/113	12/19520	0.00211076	0.0299464	0.0256902	9377/1337	2
CC	GO:0036464	cytoplasmic ribonucleoprotein granule	6/113	234/19520	0.00242121	0.0323302	0.0277352	6194/6128/60/6191/7538/5093	6
CC	GO:0030666	endocytic vesicle membrane	5/113	163/19520	0.00259625	0.0327416	0.0280881	84329/811/567/1535/11151	5
CC	GO:0035770	ribonucleoprotein granule	6/113	244/19520	0.00297916	0.0353137	0.0302946	6194/6128/60/6191/7538/5093	6
CC	GO:0090575	RNA polymerase II transcription regulator complex	5/113	170/19520	0.00311134	0.0353137	0.0302946	2353/3725/10589/3727/3726	5
CC	GO:0098554	cytoplasmic side of endoplasmic reticulum membrane	2/113	15/19520	0.00332016	0.0358893	0.0307884	6155/6231	2
MF	GO:0003735	structural constituent of ribosome	21/110	180/18337	1.82594e-21	5.02133e-19	4.47835e-19	6189/6192/6224/6194/6128/4736/6124/23521/6122/6187/6139/6155/6181/6191/3921/6205/6173/6231/6201/6167/6193	21
MF	GO:0019843	rRNA binding	7/110	64/18337	1.08066e-07	1.48591e-05	1.32524e-05	6192/1938/6122/6191/6205/6167/6193	7
MF	GO:0044389	ubiquitin-like protein ligase binding	11/110	312/18337	2.77042e-06	0.000253955	0.000226494	9636/4792/6772/71/3725/811/3309/10628/9246/51429/55284	11
MF	GO:0031625	ubiquitin protein ligase binding	10/110	293/18337	1.06802e-05	0.000734265	0.000654866	9636/4792/71/3725/811/3309/10628/9246/51429/55284	10
MF	GO:0045296	cadherin binding	10/110	332/18337	3.12604e-05	0.00171932	0.00153341	1938/1937/6128/6772/6187/3309/5093/6231/51429/8407	10
MF	GO:0003746	translation elongation factor activity	3/110	19/18337	0.00018977	0.00869781	0.00775728	1938/1937/1915	3
MF	GO:0061629	RNA polymerase II-specific DNA-binding transcription factor binding	8/110	271/18337	0.000229069	0.00899915	0.00802604	3429/2353/4792/60/6772/3725/811/3727	8
MF	GO:0045182	translation regulator activity	5/110	138/18337	0.00145999	0.0379523	0.0338484	1938/1937/51386/1915/5610	5
MF	GO:0050786	RAGE receptor binding	2/110	10/18337	0.00155507	0.0379523	0.0338484	6279/6280	2
MF	GO:0099186	structural constituent of postsynapse	2/110	10/18337	0.00155507	0.0379523	0.0338484	60/71	2
MF	GO:0008135	translation factor activity, RNA binding	4/110	84/18337	0.00163608	0.0379523	0.0338484	1938/1937/51386/1915	4
MF	GO:0001046	core promoter sequence-specific DNA binding	3/110	40/18337	0.00176571	0.0379523	0.0338484	2353/6772/10589	3
MF	GO:0008097	5S rRNA binding	2/110	11/18337	0.00189321	0.0379523	0.0338484	1938/6122	2
MF	GO:0140297	DNA-binding transcription factor binding	8/110	376/18337	0.00193212	0.0379523	0.0338484	3429/2353/4792/60/6772/3725/811/3727	8
MF	GO:0035325	Toll-like receptor binding	2/110	12/18337	0.00226296	0.0414876	0.0370014	6279/6280	2
MF	GO:0036041	long-chain fatty acid binding	2/110	13/18337	0.00266395	0.0457867	0.0408356	6279/6280	2
MF	GO:0001102	RNA polymerase II activating transcription factor binding	3/110	48/18337	0.00298555	0.0482957	0.0430733	3429/2353/3725	3

## Sheet: B cell_KEGG
ID	Description	GeneRatio	BgRatio	pvalue	p.adjust	qvalue	geneID	Count
hsa05171	Coronavirus disease - COVID-19	28/74	232/8105	7.45e-25	1.1e-22	8.39e-23	6189/6192/6224/2353/6194/4599/6128/9636/4736/4792/6124/6772/23521/6122/6187/5610/6139/6155/3725/6181/6191/3921/6205/6173/6231/6201/6167/6193	28
hsa03010	Ribosome	21/74	158/8105	1.99e-19	1.47e-17	1.12e-17	6189/6192/6224/6194/6128/4736/6124/23521/6122/6187/6139/6155/6181/6191/3921/6205/6173/6231/6201/6167/6193	21
hsa05164	Influenza A	9/74	172/8105	2.39e-05	0.00118121	0.000898933	4599/3665/4792/60/896/6772/71/5610/293	9
hsa05162	Measles	8/74	139/8105	3.55e-05	0.00131453	0.00100039	2353/4599/3665/4792/896/6772/5610/3725	8
hsa05140	Leishmaniasis	6/74	77/8105	6.7e-05	0.00198274	0.00150891	2353/4792/1915/6772/3725/1535	6
hsa05169	Epstein-Barr virus infection	9/74	202/8105	8.44e-05	0.00201774	0.00153554	9636/3665/4792/896/6772/5610/3725/811/567	9
hsa04662	B cell receptor signaling pathway	6/74	82/8105	9.54e-05	0.00201774	0.00153554	8519/2353/974/4792/3725/973	6
hsa04380	Osteoclast differentiation	7/74	128/8105	0.000155423	0.00287533	0.00218819	2353/4792/6772/3725/1535/3727/3726	7
hsa04657	IL-17 signaling pathway	6/74	94/8105	0.000203563	0.00334747	0.00254751	6279/2353/4792/6280/3725/3727	6
hsa05135	Yersinia infection	7/74	137/8105	0.000236918	0.00350638	0.00266844	2353/4792/60/71/3725/10093/10552	7
hsa05132	Salmonella infection	9/74	249/8105	0.00040767	0.00548501	0.00417423	2353/4792/60/71/3725/388/10093/51429/10552	9
hsa05166	Human T-cell leukemia virus 1 infection	8/74	222/8105	0.000888298	0.0109557	0.00833753	2353/4792/896/3725/811/567/7538/293	8
hsa05418	Fluid shear stress and atherosclerosis	6/74	139/8105	0.00162548	0.0185054	0.0140831	2353/60/1843/71/3725/1535	6
hsa05167	Kaposi sarcoma-associated herpesvirus infection	7/74	194/8105	0.00187524	0.0198239	0.0150865	2353/3665/4792/6772/5610/3725/7538	7
hsa05130	Pathogenic Escherichia coli infection	7/74	197/8105	0.00204654	0.0201925	0.015367	2353/4792/60/71/3725/10093/10552	7
hsa04620	Toll-like receptor signaling pathway	5/74	104/8105	0.0025235	0.0233424	0.0177641	2353/3665/4792/6772/3725	5
hsa05417	Lipid and atherosclerosis	7/74	215/8105	0.00334424	0.0291145	0.0221569	2353/3665/4792/3725/3309/1535/7494	7
hsa05208	Chemical carcinogenesis - reactive oxygen species	7/74	223/8105	0.00409097	0.0336368	0.0255984	2353/4792/3725/9377/1337/1535/293	7
hsa04530	Tight junction	6/74	169/8105	0.0043205	0.0336544	0.0256118	60/71/911/3725/10093/10552	6
hsa05100	Bacterial invasion of epithelial cells	4/74	77/8105	0.00524227	0.0386775	0.0294345	60/71/10093/10552	4
hsa04612	Antigen processing and presentation	4/74	78/8105	0.00548802	0.0386775	0.0294345	5721/811/3309/567	4
hsa04621	NOD-like receptor signaling pathway	6/74	184/8105	0.00651366	0.0438192	0.0333475	3665/4792/6772/3725/10628/1535	6

## Sheet: CD4+T cell_GO
ONTOLOGY	ID	Description	GeneRatio	BgRatio	pvalue	p.adjust	qvalue	geneID	Count
BP	GO:0006614	SRP-dependent cotranslational protein targeting to membrane	13/62	105/18862	1.51761e-17	2.09568e-14	1.58255e-14	6224/6144/6124/6189/6192/6187/23521/6128/6164/6139/6129/6217/6168	13
BP	GO:0006613	cotranslational protein targeting to membrane	13/62	110/18862	2.8474e-17	2.09568e-14	1.58255e-14	6224/6144/6124/6189/6192/6187/23521/6128/6164/6139/6129/6217/6168	13
BP	GO:0006413	translational initiation	15/62	193/18862	4.97361e-17	2.25223e-14	1.70077e-14	6224/6144/6124/6189/6192/6187/23521/6128/51386/6164/6139/6129/5610/6217/6168	15
BP	GO:0019080	viral gene expression	15/62	198/18862	7.31896e-17	2.25223e-14	1.70077e-14	6224/6144/6124/6189/6192/6187/23521/6128/51386/6164/6139/6129/3725/6217/6168	15
BP	GO:0000184	nuclear-transcribed mRNA catabolic process, nonsense-mediated decay	13/62	120/18862	9.18028e-17	2.25223e-14	1.70077e-14	6224/6144/6124/6189/6192/6187/23521/6128/6164/6139/6129/6217/6168	13
BP	GO:0045047	protein targeting to ER	13/62	120/18862	9.18028e-17	2.25223e-14	1.70077e-14	6224/6144/6124/6189/6192/6187/23521/6128/6164/6139/6129/6217/6168	13
BP	GO:0072599	establishment of protein localization to endoplasmic reticulum	13/62	124/18862	1.42412e-16	2.99472e-14	2.26146e-14	6224/6144/6124/6189/6192/6187/23521/6128/6164/6139/6129/6217/6168	13
BP	GO:0060337	type I interferon signaling pathway	12/62	95/18862	2.28273e-16	4.20022e-14	3.17179e-14	8519/54739/9636/3429/2537/4599/3665/3437/6672/10581/6772/4938	12
BP	GO:0071357	cellular response to type I interferon	12/62	96/18862	2.60242e-16	4.25641e-14	3.21422e-14	8519/54739/9636/3429/2537/4599/3665/3437/6672/10581/6772/4938	12
BP	GO:0034340	response to type I interferon	12/62	101/18862	4.90551e-16	7.22091e-14	5.45286e-14	8519/54739/9636/3429/2537/4599/3665/3437/6672/10581/6772/4938	12
BP	GO:0019083	viral transcription	14/62	180/18862	6.0797e-16	8.13574e-14	6.14369e-14	6224/6144/6124/6189/6192/6187/23521/6128/6164/6139/6129/3725/6217/6168	14
BP	GO:0070972	protein localization to endoplasmic reticulum	13/62	152/18862	2.12387e-15	2.60529e-13	1.96738e-13	6224/6144/6124/6189/6192/6187/23521/6128/6164/6139/6129/6217/6168	13
BP	GO:0051607	defense response to virus	15/62	260/18862	4.29438e-15	4.51523e-13	3.40967e-13	10964/8519/9636/3429/2537/596/4599/3665/3437/10581/6772/10346/4938/9188/5610	15
BP	GO:0140546	defense response to symbiont	15/62	260/18862	4.29438e-15	4.51523e-13	3.40967e-13	10964/8519/9636/3429/2537/596/4599/3665/3437/10581/6772/10346/4938/9188/5610	15
BP	GO:0000956	nuclear-transcribed mRNA catabolic process	14/62	208/18862	4.62193e-15	4.53565e-13	3.42509e-13	6224/678/6144/6124/6189/6192/6187/23521/6128/6164/6139/6129/6217/6168	14
BP	GO:0009615	response to virus	16/62	359/18862	2.62542e-14	2.41539e-12	1.82398e-12	10964/8519/9636/3429/2537/596/4599/11040/3665/3437/10581/6772/10346/4938/9188/5610	16
BP	GO:0006612	protein targeting to membrane	13/62	211/18862	1.52035e-13	1.31645e-11	9.94112e-12	6224/6144/6124/6189/6192/6187/23521/6128/6164/6139/6129/6217/6168	13
BP	GO:0090150	establishment of protein localization to membrane	14/62	354/18862	6.70946e-12	5.48685e-10	4.14339e-10	6224/6144/6124/6189/6192/6187/23521/596/6128/6164/6139/6129/6217/6168	14
BP	GO:0006402	mRNA catabolic process	14/62	375/18862	1.45041e-11	1.12369e-09	8.4855e-10	6224/678/6144/6124/6189/6192/6187/23521/6128/6164/6139/6129/6217/6168	14
BP	GO:0006401	RNA catabolic process	14/62	414/18862	5.39903e-11	3.97369e-09	3.00072e-09	6224/678/6144/6124/6189/6192/6187/23521/6128/6164/6139/6129/6217/6168	14
BP	GO:0006605	protein targeting	14/62	441/18862	1.24185e-10	8.70477e-09	6.5734e-09	6224/6144/6124/6189/6192/6187/23521/6128/6164/6139/3329/6129/6217/6168	14
BP	GO:0050792	regulation of viral process	10/62	186/18862	4.70436e-10	3.1328e-08	2.36573e-08	8519/4061/9636/596/4599/10581/6772/10346/4938/5610	10
BP	GO:0048525	negative regulation of viral process	8/62	89/18862	4.89501e-10	3.1328e-08	2.36573e-08	8519/4061/9636/4599/10581/6772/4938/5610	8
BP	GO:0034341	response to interferon-gamma	10/62	197/18862	8.24231e-10	4.85307e-08	3.66479e-08	8519/9021/23521/4502/3665/6672/10581/6772/10346/4938	10
BP	GO:0043903	regulation of biological process involved in symbiotic interaction	10/62	197/18862	8.24231e-10	4.85307e-08	3.66479e-08	8519/4061/9636/596/4599/10581/6772/10346/4938/5610	10
BP	GO:1903900	regulation of viral life cycle	9/62	148/18862	1.25667e-09	7.11469e-08	5.37265e-08	8519/4061/9636/596/4599/10581/10346/4938/5610	9
BP	GO:0019079	viral genome replication	8/62	129/18862	9.5388e-09	5.20041e-07	3.92709e-07	8519/9636/3429/596/4599/10581/4938/5610	8
BP	GO:0045069	regulation of viral genome replication	7/62	83/18862	9.98764e-09	5.25064e-07	3.96502e-07	8519/9636/596/4599/10581/4938/5610	7
BP	GO:0019058	viral life cycle	11/62	348/18862	1.57989e-08	8.01932e-07	6.05578e-07	8519/4061/9636/3429/596/4599/1604/10581/10346/4938/5610	11
BP	GO:0060333	interferon-gamma-mediated signaling pathway	7/62	91/18862	1.90763e-08	9.36009e-07	7.06826e-07	9021/4502/3665/6672/6772/10346/4938	7
BP	GO:0045071	negative regulation of viral genome replication	6/62	54/18862	2.24801e-08	1.06744e-06	8.06078e-07	8519/9636/4599/10581/4938/5610	6
BP	GO:0071346	cellular response to interferon-gamma	8/62	177/18862	1.12659e-07	5.1823e-06	3.91341e-06	9021/23521/4502/3665/6672/6772/10346/4938	8
BP	GO:0035455	response to interferon-alpha	4/62	21/18862	6.07291e-07	2.70888e-05	2.04561e-05	8519/3437/10581/5610	4
BP	GO:1903706	regulation of hemopoiesis	10/62	415/18862	9.24054e-07	4.00061e-05	3.02105e-05	678/9636/64332/3665/6774/6772/639/3725/4609/4831	10
BP	GO:0035456	response to interferon-beta	4/62	31/18862	3.11512e-06	0.000131013	9.89343e-05	8519/54739/10581/6772	4
BP	GO:0046596	regulation of viral entry into host cell	4/62	41/18862	9.78248e-06	0.000399995	0.000302056	8519/4061/10581/10346	4
BP	GO:0051090	regulation of DNA-binding transcription factor activity	9/62	444/18862	1.37408e-05	0.000546661	0.000412811	6279/6280/84159/5292/6774/6672/10346/3725/5610	9
BP	GO:0051238	sequestering of metal ion	3/62	16/18862	1.83702e-05	0.00069733	0.000526588	6279/6280/2512	3
BP	GO:0052372	modulation by symbiont of entry into host	4/62	48/18862	1.84755e-05	0.00069733	0.000526588	8519/4061/10581/10346	4
BP	GO:0045637	regulation of myeloid cell differentiation	7/62	258/18862	2.13847e-05	0.000786956	0.000594269	9636/3665/6774/6772/3725/4609/4831	7
BP	GO:1902105	regulation of leukocyte differentiation	7/62	279/18862	3.52672e-05	0.00126618	0.000956153	678/64332/3665/639/3725/4609/4831	7
BP	GO:0046597	negative regulation of viral entry into host cell	3/62	20/18862	3.70472e-05	0.00129842	0.000980498	8519/4061/10581	3
BP	GO:0046916	cellular transition metal ion homeostasis	5/62	118/18862	4.28366e-05	0.00144258	0.00108936	6279/6280/4502/2512/4609	5
BP	GO:0045655	regulation of monocyte differentiation	3/62	21/18862	4.31206e-05	0.00144258	0.00108936	3665/3725/4609	3
BP	GO:0032727	positive regulation of interferon-alpha production	3/62	22/18862	4.98122e-05	0.00162941	0.00123045	3665/6772/3329	3
BP	GO:1903131	mononuclear cell differentiation	8/62	411/18862	5.73606e-05	0.00183554	0.00138611	678/64332/596/3665/6774/639/3725/4609	8
BP	GO:1903901	negative regulation of viral life cycle	3/62	24/18862	6.51613e-05	0.0020408	0.0015411	8519/4061/10581	3
BP	GO:0051701	biological process involved in interaction with host	6/62	219/18862	8.1777e-05	0.00250783	0.00189378	8519/4061/1604/10581/10346/5610	6
BP	GO:0055076	transition metal ion homeostasis	5/62	139/18862	9.33805e-05	0.00280523	0.00211836	6279/6280/4502/2512/4609	5
BP	GO:0046718	viral entry into host cell	5/62	140/18862	9.65961e-05	0.00284379	0.00214748	8519/4061/1604/10581/10346	5
BP	GO:0032607	interferon-alpha production	3/62	28/18862	0.000104485	0.00295772	0.00223352	3665/6772/3329	3
BP	GO:0032647	regulation of interferon-alpha production	3/62	28/18862	0.000104485	0.00295772	0.00223352	3665/6772/3329	3
BP	GO:0070102	interleukin-6-mediated signaling pathway	3/62	30/18862	0.000128884	0.00353071	0.00266621	9021/6774/6772	3
BP	GO:0046631	alpha-beta T cell activation	5/62	149/18862	0.000129523	0.00353071	0.00266621	64332/596/1604/6774/639	5
BP	GO:0044409	entry into host	5/62	153/18862	0.000146652	0.00392495	0.00296392	8519/4061/1604/10581/10346	5
BP	GO:0045648	positive regulation of erythrocyte differentiation	3/62	32/18862	0.000156719	0.00411948	0.00311082	9636/6774/6772	3
BP	GO:0002224	toll-like receptor signaling pathway	5/62	157/18862	0.000165465	0.00427306	0.0032268	6279/6280/3665/3329/1535	5
BP	GO:0051092	positive regulation of NF-kappaB transcription factor activity	5/62	159/18862	0.000175537	0.004455	0.00336419	6279/6280/6774/10346/5610	5
BP	GO:0030224	monocyte differentiation	3/62	36/18862	0.000223497	0.00548313	0.00414058	3665/3725/4609	3
BP	GO:0045730	respiratory burst	3/62	36/18862	0.000223497	0.00548313	0.00414058	1604/1043/1535	3
BP	GO:0051091	positive regulation of DNA-binding transcription factor activity	6/62	266/18862	0.000235886	0.0056922	0.00429846	6279/6280/84159/6774/10346/5610	6
BP	GO:0006882	cellular zinc ion homeostasis	3/62	38/18862	0.000262832	0.00624014	0.00471223	6279/6280/4502	3
BP	GO:0052126	movement in host environment	5/62	175/18862	0.000273954	0.00640095	0.00483367	8519/4061/1604/10581/10346	5
BP	GO:0055069	zinc ion homeostasis	3/62	40/18862	0.000306384	0.00704684	0.00532141	6279/6280/4502	3
BP	GO:0010950	positive regulation of endopeptidase activity	5/62	182/18862	0.000328238	0.00743333	0.00561327	6279/6280/6774/3329/4609	5
BP	GO:0002181	cytoplasmic translation	4/62	102/18862	0.000353442	0.00776518	0.00586386	23521/6128/51386/6139	4
BP	GO:0045639	positive regulation of myeloid cell differentiation	4/62	102/18862	0.000353442	0.00776518	0.00586386	9636/6774/6772/3725	4
BP	GO:0046632	alpha-beta T cell differentiation	4/62	107/18862	0.000423992	0.00917818	0.00693089	64332/596/6774/639	4
BP	GO:0030099	myeloid cell differentiation	7/62	419/18862	0.000435724	0.00929545	0.00701945	9636/3665/6774/6772/3725/4609/4831	7
BP	GO:0071354	cellular response to interleukin-6	3/62	46/18862	0.000464182	0.00948409	0.0071619	9021/6774/6772	3
BP	GO:0033033	negative regulation of myeloid cell apoptotic process	2/62	10/18862	0.000470339	0.00948409	0.0071619	596/3665	2
BP	GO:0071104	response to interleukin-9	2/62	10/18862	0.000470339	0.00948409	0.0071619	6774/6772	2
BP	GO:0072203	cell proliferation involved in metanephros development	2/62	10/18862	0.000470339	0.00948409	0.0071619	6772/4609	2
BP	GO:0045646	regulation of erythrocyte differentiation	3/62	47/18862	0.000494673	0.00983999	0.00743065	9636/6774/6772	3
BP	GO:0010952	positive regulation of peptidase activity	5/62	200/18862	0.000505316	0.00991766	0.00748931	6279/6280/6774/3329/4609	5
BP	GO:0001819	positive regulation of cytokine production	7/62	437/18862	0.000559761	0.0104247	0.0078722	3665/6774/6772/9188/3329/5610/1535	7
BP	GO:0043281	regulation of cysteine-type endopeptidase activity involved in apoptotic process	5/62	205/18862	0.000565298	0.0104247	0.0078722	6279/6280/2537/3329/4609	5
BP	GO:0033210	leptin-mediated signaling pathway	2/62	11/18862	0.000573642	0.0104247	0.0078722	6774/7357	2
BP	GO:0070106	interleukin-27-mediated signaling pathway	2/62	11/18862	0.000573642	0.0104247	0.0078722	6774/6772	2
BP	GO:0070757	interleukin-35-mediated signaling pathway	2/62	11/18862	0.000573642	0.0104247	0.0078722	6774/6772	2
BP	GO:1902033	regulation of hematopoietic stem cell proliferation	2/62	11/18862	0.000573642	0.0104247	0.0078722	5292/5610	2
BP	GO:0070741	response to interleukin-6	3/62	50/18862	0.000593763	0.0106284	0.00802604	9021/6774/6772	3
BP	GO:0002221	pattern recognition receptor signaling pathway	5/62	208/18862	0.000603768	0.0106284	0.00802604	6279/6280/3665/3329/1535	5
BP	GO:0002761	regulation of myeloid leukocyte differentiation	4/62	118/18862	0.000613734	0.0106284	0.00802604	3665/3725/4609/4831	4
BP	GO:0008637	apoptotic mitochondrial changes	4/62	118/18862	0.000613734	0.0106284	0.00802604	2537/596/3329/3725	4
BP	GO:0035821	modulation of process of other organism	4/62	123/18862	0.000717261	0.0122768	0.00927084	6280/3429/3725/5610	4
BP	GO:0001836	release of cytochrome c from mitochondria	3/62	55/18862	0.000785536	0.0132909	0.0100366	2537/596/3725	3
BP	GO:0033689	negative regulation of osteoblast proliferation	2/62	13/18862	0.000810088	0.0133983	0.0101177	596/5610	2
BP	GO:0070486	leukocyte aggregation	2/62	13/18862	0.000810088	0.0133983	0.0101177	6279/6280	2
BP	GO:0032479	regulation of type I interferon production	4/62	128/18862	0.000832591	0.0136175	0.0102832	9636/3665/6772/3329	4
BP	GO:0032606	type I interferon production	4/62	129/18862	0.000857136	0.0138649	0.01047	9636/3665/6772/3329	4
BP	GO:0046777	protein autophosphorylation	5/62	226/18862	0.000877404	0.0140385	0.0106011	5292/11040/9262/5610/4831	5
BP	GO:0022613	ribonucleoprotein complex biogenesis	7/62	473/18862	0.000891863	0.0141164	0.01066	6187/23521/6128/51386/9188/6129/6217	7
BP	GO:0042110	T cell activation	7/62	474/18862	0.000902921	0.0141394	0.0106773	678/64332/596/1604/6774/3329/639	7
BP	GO:2000116	regulation of cysteine-type endopeptidase activity	5/62	230/18862	0.000949043	0.0147052	0.0111046	6279/6280/2537/3329/4609	5
BP	GO:2001244	positive regulation of intrinsic apoptotic signaling pathway	3/62	60/18862	0.00101274	0.0154067	0.0116343	6279/6280/596	3
BP	GO:0043280	positive regulation of cysteine-type endopeptidase activity involved in apoptotic process	4/62	135/18862	0.00101525	0.0154067	0.0116343	6279/6280/3329/4609	4
BP	GO:0072075	metanephric mesenchyme development	2/62	15/18862	0.00108589	0.0163106	0.0123169	6772/4609	2
BP	GO:0032613	interleukin-10 production	3/62	62/18862	0.00111407	0.0165647	0.0125088	9636/6774/3329	3
BP	GO:0017014	protein nitrosylation	2/62	16/18862	0.0012384	0.0180487	0.0136295	6279/6280	2
BP	GO:0018119	peptidyl-cysteine S-nitrosylation	2/62	16/18862	0.0012384	0.0180487	0.0136295	6279/6280	2
BP	GO:0030217	T cell differentiation	5/62	246/18862	0.00127989	0.0184706	0.0139481	678/64332/596/6774/639	5
BP	GO:0051782	negative regulation of cell division	2/62	17/18862	0.00140055	0.0200156	0.0151148	10628/4609	2
BP	GO:0072088	nephron epithelium morphogenesis	3/62	69/18862	0.00151839	0.021491	0.0162289	596/6772/4609	3
BP	GO:2001056	positive regulation of cysteine-type endopeptidase activity	4/62	151/18862	0.00153553	0.0215266	0.0162558	6279/6280/3329/4609	4
BP	GO:0002523	leukocyte migration involved in inflammatory response	2/62	18/18862	0.00157229	0.0218341	0.016488	6279/6280	2
BP	GO:0035019	somatic stem cell population maintenance	3/62	71/18862	0.00164866	0.0224706	0.0169686	678/6774/4609	3
BP	GO:0072028	nephron morphogenesis	3/62	71/18862	0.00164866	0.0224706	0.0169686	596/6772/4609	3
BP	GO:0048708	astrocyte differentiation	3/62	72/18862	0.00171633	0.0228427	0.0172497	6279/6280/6774	3
BP	GO:0002544	chronic inflammatory response	2/62	19/18862	0.00175355	0.0228427	0.0172497	6279/6280	2
BP	GO:0044320	cellular response to leptin stimulus	2/62	19/18862	0.00175355	0.0228427	0.0172497	6774/7357	2
BP	GO:0051900	regulation of mitochondrial depolarization	2/62	19/18862	0.00175355	0.0228427	0.0172497	2537/596	2
BP	GO:0072074	kidney mesenchyme development	2/62	19/18862	0.00175355	0.0228427	0.0172497	6772/4609	2
BP	GO:0032481	positive regulation of type I interferon production	3/62	77/18862	0.00208075	0.0268673	0.0202888	3665/6772/3329	3
BP	GO:0002053	positive regulation of mesenchymal cell proliferation	2/62	21/18862	0.0021444	0.0269791	0.0203732	6772/4609	2
BP	GO:0002363	alpha-beta T cell lineage commitment	2/62	21/18862	0.0021444	0.0269791	0.0203732	596/6774	2
BP	GO:0072111	cell proliferation involved in kidney development	2/62	21/18862	0.0021444	0.0269791	0.0203732	6772/4609	2
BP	GO:0043369	CD4-positive or CD8-positive, alpha-beta T cell lineage commitment	2/62	22/18862	0.00235385	0.0288739	0.0218041	596/6774	2
BP	GO:0044346	fibroblast apoptotic process	2/62	22/18862	0.00235385	0.0288739	0.0218041	9262/4609	2
BP	GO:0051882	mitochondrial depolarization	2/62	22/18862	0.00235385	0.0288739	0.0218041	2537/596	2
BP	GO:0001656	metanephros development	3/62	82/18862	0.00248994	0.0302908	0.0228741	596/6772/4609	3
BP	GO:0002831	regulation of response to biotic stimulus	6/62	420/18862	0.00252506	0.0304663	0.0230066	9021/3665/1604/6772/3329/1535	6
BP	GO:0033032	regulation of myeloid cell apoptotic process	2/62	23/18862	0.00257259	0.0307874	0.0232491	596/3665	2
BP	GO:0052548	regulation of endopeptidase activity	6/62	426/18862	0.00270927	0.0321617	0.0242869	6279/6280/2537/6774/3329/4609	6
BP	GO:0044321	response to leptin	2/62	24/18862	0.00280054	0.0329791	0.0249041	6774/7357	2
BP	GO:0032755	positive regulation of interleukin-6 production	3/62	86/18862	0.00285072	0.0333037	0.0251492	6774/3329/1535	3
BP	GO:0006919	activation of cysteine-type endopeptidase activity involved in apoptotic process	3/62	87/18862	0.00294567	0.033674	0.0254289	6279/6280/3329	3
BP	GO:0051899	membrane depolarization	3/62	87/18862	0.00294567	0.033674	0.0254289	2537/596/3725	3
BP	GO:0060330	regulation of response to interferon-gamma	2/62	25/18862	0.00303764	0.033674	0.0254289	9021/6772	2
BP	GO:0060334	regulation of interferon-gamma-mediated signaling pathway	2/62	25/18862	0.00303764	0.033674	0.0254289	9021/6772	2
BP	GO:0071425	hematopoietic stem cell proliferation	2/62	25/18862	0.00303764	0.033674	0.0254289	5292/5610	2
BP	GO:0060993	kidney morphogenesis	3/62	88/18862	0.00304256	0.033674	0.0254289	596/6772/4609	3
BP	GO:0072080	nephron tubule development	3/62	88/18862	0.00304256	0.033674	0.0254289	596/6772/4609	3
BP	GO:0061326	renal tubule development	3/62	90/18862	0.00324215	0.0356153	0.0268949	596/6772/4609	3
BP	GO:0010464	regulation of mesenchymal cell proliferation	2/62	26/18862	0.00328383	0.0358059	0.0270388	6772/4609	2
BP	GO:0042254	ribosome biogenesis	5/62	307/18862	0.00335378	0.0362997	0.0274117	6187/6128/9188/6129/6217	5
BP	GO:0051702	biological process involved in interaction with symbiont	3/62	92/18862	0.00344962	0.0370645	0.0279892	3429/3329/3725	3
BP	GO:0002360	T cell lineage commitment	2/62	27/18862	0.00353906	0.0374783	0.0283017	596/6774	2
BP	GO:0033688	regulation of osteoblast proliferation	2/62	27/18862	0.00353906	0.0374783	0.0283017	596/5610	2
BP	GO:0052547	regulation of peptidase activity	6/62	455/18862	0.00374588	0.0393852	0.0297417	6279/6280/2537/6774/3329/4609	6
BP	GO:0032602	chemokine production	3/62	95/18862	0.00377578	0.039418	0.0297665	6279/6280/5610	3
BP	GO:0033028	myeloid cell apoptotic process	2/62	28/18862	0.00380325	0.0394253	0.0297719	596/3665	2
BP	GO:0072539	T-helper 17 cell differentiation	2/62	29/18862	0.00407636	0.0419609	0.0316867	64332/6774	2
BP	GO:0051817	modulation of process of other organism involved in symbiotic interaction	3/62	98/18862	0.00412016	0.0421172	0.0318048	3429/3725/5610	3
BP	GO:0038111	interleukin-7-mediated signaling pathway	2/62	30/18862	0.00435833	0.0436596	0.0329695	1154/6774	2
BP	GO:0090183	regulation of kidney development	2/62	30/18862	0.00435833	0.0436596	0.0329695	6772/4609	2
BP	GO:0035710	CD4-positive, alpha-beta T cell activation	3/62	100/18862	0.00436003	0.0436596	0.0329695	64332/1604/6774	3
BP	GO:0046634	regulation of alpha-beta T cell activation	3/62	101/18862	0.00448308	0.0445885	0.0336709	64332/1604/639	3
BP	GO:0002573	myeloid leukocyte differentiation	4/62	204/18862	0.00454309	0.0448821	0.0338926	3665/3725/4609/4831	4
BP	GO:0002347	response to tumor cell	2/62	31/18862	0.00464908	0.045623	0.0344521	10628/3329	2
BP	GO:0017148	negative regulation of translation	4/62	206/18862	0.00470233	0.04584	0.034616	678/23521/6774/5610	4
BP	GO:0072503	cellular divalent inorganic cation homeostasis	6/62	480/18862	0.00485522	0.0463968	0.0350365	6279/6280/4502/596/1604/1043	6
BP	GO:0051651	maintenance of location in cell	4/62	209/18862	0.0049482	0.0463968	0.0350365	6279/6280/6672/2512	4
BP	GO:0033687	osteoblast proliferation	2/62	32/18862	0.00494857	0.0463968	0.0350365	596/5610	2
BP	GO:0046825	regulation of protein export from nucleus	2/62	32/18862	0.00494857	0.0463968	0.0350365	3429/6672	2
BP	GO:1901099	negative regulation of signal transduction in absence of ligand	2/62	32/18862	0.00494857	0.0463968	0.0350365	2537/596	2
BP	GO:2001240	negative regulation of extrinsic apoptotic signaling pathway in absence of ligand	2/62	32/18862	0.00494857	0.0463968	0.0350365	2537/596	2
BP	GO:0031669	cellular response to nutrient levels	4/62	210/18862	0.00503204	0.0468807	0.0354019	5292/596/3725/5610	4
BP	GO:0043312	neutrophil degranulation	6/62	485/18862	0.0051034	0.047195	0.0356393	6279/6280/1604/2512/1535/4831	6
BP	GO:0072009	nephron epithelium development	3/62	106/18862	0.0051299	0.047195	0.0356393	596/6772/4609	3
BP	GO:0002283	neutrophil activation involved in immune response	6/62	488/18862	0.00525673	0.0477649	0.0360696	6279/6280/1604/2512/1535/4831	6
BP	GO:0072538	T-helper 17 type immune response	2/62	33/18862	0.00525674	0.0477649	0.0360696	64332/6774	2
CC	GO:0022626	cytosolic ribosome	14/64	107/19520	3.4975e-19	4.02212e-17	3.20297e-17	6224/6144/6124/9636/6189/6192/6187/23521/6128/6164/6139/6129/6217/6168	14
CC	GO:0044391	ribosomal subunit	14/64	187/19520	1.05648e-15	6.07477e-14	4.83758e-14	6224/6144/6124/9636/6189/6192/6187/23521/6128/6164/6139/6129/6217/6168	14
CC	GO:0005840	ribosome	15/64	243/19520	1.60703e-15	6.16029e-14	4.90568e-14	6224/6144/6124/9636/6189/6192/6187/23521/6128/6164/6139/6129/5610/6217/6168	15
CC	GO:0022625	cytosolic large ribosomal subunit	8/64	57/19520	1.23616e-11	3.55396e-10	2.83015e-10	6144/6124/23521/6128/6164/6139/6129/6168	8
CC	GO:0015934	large ribosomal subunit	8/64	115/19520	3.81496e-09	8.77442e-08	6.98741e-08	6144/6124/23521/6128/6164/6139/6129/6168	8
CC	GO:0022627	cytosolic small ribosomal subunit	6/64	46/19520	8.26013e-09	1.58319e-07	1.26076e-07	6224/9636/6189/6192/6187/6217	6
CC	GO:0015935	small ribosomal subunit	6/64	74/19520	1.52108e-07	2.49891e-06	1.98998e-06	6224/9636/6189/6192/6187/6217	6
CC	GO:0005925	focal adhesion	8/64	416/19520	6.20089e-05	0.000890383	0.000709046	6124/6189/6187/23521/6128/6129/6217/6168	8
CC	GO:0030055	cell-substrate junction	8/64	423/19520	6.96821e-05	0.000890383	0.000709046	6124/6189/6187/23521/6128/6129/6217/6168	8
CC	GO:0005942	phosphatidylinositol 3-kinase complex	2/64	29/19520	0.00405812	0.0466683	0.0371638	9021/1154	2
MF	GO:0003735	structural constituent of ribosome	13/62	180/18337	2.77358e-14	4.63188e-12	3.70784e-12	6224/6144/6124/6189/6192/6187/23521/6128/6164/6139/6129/6217/6168	13
MF	GO:0070491	repressing transcription factor binding	4/62	71/18337	9.7156e-05	0.00705181	0.00564501	596/6774/6772/4609	4
MF	GO:0003725	double-stranded RNA binding	4/62	76/18337	0.000126679	0.00705181	0.00564501	4938/9188/3329/5610	4
MF	GO:0005504	fatty acid binding	3/62	37/18337	0.000263493	0.0110008	0.0088062	6279/6280/4831	3
MF	GO:0050786	RAGE receptor binding	2/62	10/18337	0.000497416	0.0166137	0.0132993	6279/6280	2
MF	GO:0044389	ubiquitin-like protein ligase binding	6/62	312/18337	0.000638469	0.0173291	0.013872	10628/9636/596/6772/3329/3725	6
MF	GO:0035325	Toll-like receptor binding	2/62	12/18337	0.000726369	0.0173291	0.013872	6279/6280	2
MF	GO:0036041	long-chain fatty acid binding	2/62	13/18337	0.000856568	0.0178809	0.0143137	6279/6280	2
MF	GO:0046935	1-phosphatidylinositol-3-kinase regulator activity	2/62	16/18337	0.00130922	0.0242932	0.0194468	9021/1154	2
MF	GO:0140297	DNA-binding transcription factor binding	6/62	376/18337	0.00166874	0.0271183	0.0217083	3429/596/6774/6772/3725/4609	6
MF	GO:0033293	monocarboxylic acid binding	3/62	71/18337	0.00178623	0.0271183	0.0217083	6279/6280/4831	3
MF	GO:0035014	phosphatidylinositol 3-kinase regulator activity	2/62	20/18337	0.00205496	0.0285982	0.022893	9021/1154	2
MF	GO:0033613	activating transcription factor binding	3/62	78/18337	0.00233802	0.0300346	0.0240428	3429/3725/4609	3
MF	GO:0031625	ubiquitin protein ligase binding	5/62	293/18337	0.0030976	0.03695	0.0295786	10628/9636/596/3329/3725	5

## Sheet: CD4+T cell_KEGG
ID	Description	GeneRatio	BgRatio	pvalue	p.adjust	qvalue	geneID	Count
hsa05171	Coronavirus disease - COVID-19	20/45	232/8105	1.01175e-19	1.42657e-17	1.13955e-17	6224/6144/6124/9636/6189/6192/6187/23521/4599/6128/6774/6772/6164/4938/6139/6129/3725/5610/6217/6168	20
hsa03010	Ribosome	13/45	158/8105	1.52309e-12	1.07378e-10	8.57742e-11	6224/6144/6124/6189/6192/6187/23521/6128/6164/6139/6129/6217/6168	13
hsa05162	Measles	8/45	139/8105	7.71984e-07	3.62832e-05	2.89833e-05	596/4599/3665/6774/6772/4938/3725/5610	8
hsa05169	Epstein-Barr virus infection	9/45	202/8105	1.26457e-06	4.45762e-05	3.56077e-05	9636/596/3665/6774/6772/4938/3725/5610/4609	9
hsa05160	Hepatitis C	8/45	157/8105	1.94536e-06	5.4859e-05	4.38217e-05	9021/4599/3665/6774/6772/4938/5610/4609	8
hsa04630	JAK-STAT signaling pathway	7/45	162/8105	2.68173e-05	0.000630207	0.000503413	9021/1154/5292/596/6774/6772/4609	7
hsa04621	NOD-like receptor signaling pathway	7/45	184/8105	6.06564e-05	0.00122179	0.000975974	10628/596/3665/6772/4938/3725/1535	7
hsa04933	AGE-RAGE signaling pathway in diabetic complications	5/45	100/8105	0.000213628	0.0037652	0.00300766	5292/596/6774/6772/3725	5
hsa05161	Hepatitis B	6/45	162/8105	0.000248323	0.0038904	0.00310767	596/3665/6774/6772/3725/4609	6
hsa05164	Influenza A	6/45	172/8105	0.000343152	0.00483844	0.00386498	9021/4599/3665/6772/4938/5610	6
hsa05221	Acute myeloid leukemia	4/45	67/8105	0.000492531	0.00631335	0.00504314	5292/11040/6774/4609	4
hsa04917	Prolactin signaling pathway	4/45	70/8105	0.000582092	0.00683958	0.00546349	9021/1154/6774/6772	4
hsa05167	Kaposi sarcoma-associated herpesvirus infection	6/45	194/8105	0.000651482	0.00706608	0.00564442	3665/6774/6772/3725/5610/4609	6
hsa05417	Lipid and atherosclerosis	6/45	215/8105	0.00111495	0.0112291	0.00896989	596/3665/6774/3329/3725/1535	6
hsa04217	Necroptosis	5/45	159/8105	0.00176924	0.0166308	0.0132848	596/6774/6772/2512/5610	5
hsa05203	Viral carcinogenesis	5/45	204/8105	0.00518625	0.043044	0.0343838	3665/6774/6672/3725/5610	5
hsa04380	Osteoclast differentiation	4/45	128/8105	0.00536178	0.043044	0.0343838	9021/6772/3725/1535	4
hsa05321	Inflammatory bowel disease	3/45	65/8105	0.00549498	0.043044	0.0343838	6774/6772/3725	3

## Sheet: CD8+T cell_GO
ONTOLOGY	ID	Description	GeneRatio	BgRatio	pvalue	p.adjust	qvalue	geneID	Count
BP	GO:0045047	protein targeting to ER	28/91	120/18862	1.74964e-40	2.08602e-37	1.76592e-37	6208/6224/6189/23521/6128/6188/9709/6233/6124/6187/6231/6194/6173/6201/6157/6181/4736/6139/6232/6137/6144/6122/6217/6125/6147/6191/6129/6164	28
BP	GO:0006614	SRP-dependent cotranslational protein targeting to membrane	27/91	105/18862	2.66926e-40	2.08602e-37	1.76592e-37	6208/6224/6189/23521/6128/6188/6233/6124/6187/6231/6194/6173/6201/6157/6181/4736/6139/6232/6137/6144/6122/6217/6125/6147/6191/6129/6164	27
BP	GO:0072599	establishment of protein localization to endoplasmic reticulum	28/91	124/18862	4.8772e-40	2.54102e-37	2.1511e-37	6208/6224/6189/23521/6128/6188/9709/6233/6124/6187/6231/6194/6173/6201/6157/6181/4736/6139/6232/6137/6144/6122/6217/6125/6147/6191/6129/6164	28
BP	GO:0006613	cotranslational protein targeting to membrane	27/91	110/18862	1.10682e-39	4.32488e-37	3.66123e-37	6208/6224/6189/23521/6128/6188/6233/6124/6187/6231/6194/6173/6201/6157/6181/4736/6139/6232/6137/6144/6122/6217/6125/6147/6191/6129/6164	27
BP	GO:0000184	nuclear-transcribed mRNA catabolic process, nonsense-mediated decay	27/91	120/18862	1.53849e-38	4.80933e-36	4.07134e-36	6208/6224/6189/23521/6128/6188/6233/6124/6187/6231/6194/6173/6201/6157/6181/4736/6139/6232/6137/6144/6122/6217/6125/6147/6191/6129/6164	27
BP	GO:0070972	protein localization to endoplasmic reticulum	28/91	152/18862	2.55259e-37	6.64949e-35	5.62912e-35	6208/6224/6189/23521/6128/6188/9709/6233/6124/6187/6231/6194/6173/6201/6157/6181/4736/6139/6232/6137/6144/6122/6217/6125/6147/6191/6129/6164	28
BP	GO:0006413	translational initiation	29/91	193/18862	6.23578e-36	1.39236e-33	1.1787e-33	6208/6224/6189/23521/6128/5610/6188/6233/6124/6187/6231/6194/6173/6201/6157/6181/51386/4736/6139/6232/6137/6144/6122/6217/6125/6147/6191/6129/6164	29
BP	GO:0019080	viral gene expression	29/91	198/18862	1.36658e-35	2.66995e-33	2.26024e-33	6208/6224/6189/23521/6128/10410/6188/6233/6124/6187/6231/6194/6173/6201/6157/6181/51386/4736/6139/6232/6137/6144/6122/6217/6125/6147/6191/6129/6164	29
BP	GO:0019083	viral transcription	28/91	180/18862	4.1001e-35	7.1205e-33	6.02786e-33	6208/6224/6189/23521/6128/10410/6188/6233/6124/6187/6231/6194/6173/6201/6157/6181/4736/6139/6232/6137/6144/6122/6217/6125/6147/6191/6129/6164	28
BP	GO:0000956	nuclear-transcribed mRNA catabolic process	28/91	208/18862	2.9318e-33	4.5824e-31	3.87923e-31	6208/6224/6189/23521/6128/6188/6233/6124/6187/6231/6194/6173/6201/6157/6181/4736/6139/6232/6137/6144/6122/6217/6125/6147/6191/6129/678/6164	28
BP	GO:0006612	protein targeting to membrane	27/91	211/18862	1.97366e-31	2.80439e-29	2.37405e-29	6208/6224/6189/23521/6128/6188/6233/6124/6187/6231/6194/6173/6201/6157/6181/4736/6139/6232/6137/6144/6122/6217/6125/6147/6191/6129/6164	27
BP	GO:0006401	RNA catabolic process	31/91	414/18862	7.43051e-29	9.67824e-27	8.19312e-27	6208/6224/6189/23521/6128/6188/5721/6233/3669/6124/6187/6231/6194/6173/6201/6157/6181/4736/6139/6232/6137/6144/6122/6217/6125/6147/6191/6129/678/6164/5687	31
BP	GO:0006402	mRNA catabolic process	30/91	375/18862	9.40271e-29	1.1305e-26	9.57021e-27	6208/6224/6189/23521/6128/6188/5721/6233/6124/6187/6231/6194/6173/6201/6157/6181/4736/6139/6232/6137/6144/6122/6217/6125/6147/6191/6129/678/6164/5687	30
BP	GO:0090150	establishment of protein localization to membrane	27/91	354/18862	2.94721e-25	3.29035e-23	2.78544e-23	6208/6224/6189/23521/6128/6188/6233/6124/6187/6231/6194/6173/6201/6157/6181/4736/6139/6232/6137/6144/6122/6217/6125/6147/6191/6129/6164	27
BP	GO:0060337	type I interferon signaling pathway	18/91	95/18862	2.7945e-24	2.91187e-22	2.46504e-22	8519/54739/3429/2537/9636/4599/10410/6772/3665/3669/6672/10581/3437/4938/684/91543/103/3434	18
BP	GO:0071357	cellular response to type I interferon	18/91	96/18862	3.42672e-24	3.34748e-22	2.83381e-22	8519/54739/3429/2537/9636/4599/10410/6772/3665/3669/6672/10581/3437/4938/684/91543/103/3434	18
BP	GO:0006605	protein targeting	28/91	441/18862	5.24723e-24	4.82437e-22	4.08407e-22	6208/6224/6189/23521/6128/6188/9709/6233/6124/6187/6231/6194/6173/6201/6157/6181/4736/6139/6232/6137/6144/6122/6217/6125/6147/6191/6129/6164	28
BP	GO:0034340	response to type I interferon	18/91	101/18862	9.1776e-24	7.96922e-22	6.74634e-22	8519/54739/3429/2537/9636/4599/10410/6772/3665/3669/6672/10581/3437/4938/684/91543/103/3434	18
BP	GO:0009615	response to virus	25/91	359/18862	2.15908e-22	1.77612e-20	1.50358e-20	10964/8519/3429/2537/9636/4599/10410/6772/3665/5610/3669/10581/10346/1937/3437/83666/4938/684/54541/91543/103/5359/3434/10561/3965	25
BP	GO:0051607	defense response to virus	22/91	260/18862	1.43587e-21	1.0687e-19	9.04706e-20	10964/8519/3429/2537/9636/4599/10410/6772/3665/5610/3669/10581/10346/3437/83666/4938/684/54541/91543/103/5359/3434	22
BP	GO:0140546	defense response to symbiont	22/91	260/18862	1.43587e-21	1.0687e-19	9.04706e-20	10964/8519/3429/2537/9636/4599/10410/6772/3665/5610/3669/10581/10346/3437/83666/4938/684/54541/91543/103/5359/3434	22
BP	GO:0048525	negative regulation of viral process	14/91	89/18862	7.43051e-18	5.27904e-16	4.46897e-16	8519/4061/9636/4599/10410/6772/5610/3669/10581/4938/684/91543/5359/3434	14
BP	GO:1903900	regulation of viral life cycle	16/91	148/18862	1.42082e-17	9.65542e-16	8.1738e-16	8519/4061/9636/4599/10410/5610/3669/10581/10346/4938/684/91543/103/5359/3434/3965	16
BP	GO:0045071	negative regulation of viral genome replication	12/91	54/18862	2.17957e-17	1.41944e-15	1.20163e-15	8519/9636/4599/10410/5610/3669/10581/4938/684/91543/5359/3434	12
BP	GO:0050792	regulation of viral process	17/91	186/18862	2.28693e-17	1.42979e-15	1.21039e-15	8519/4061/9636/4599/10410/6772/5610/3669/10581/10346/4938/684/91543/103/5359/3434/3965	17
BP	GO:0019079	viral genome replication	15/91	129/18862	5.14126e-17	3.09069e-15	2.61642e-15	8519/3429/9636/4599/10410/5610/3669/10581/4938/684/91543/103/5359/3434/5093	15
BP	GO:0043903	regulation of biological process involved in symbiotic interaction	17/91	197/18862	6.0871e-17	3.52375e-15	2.98303e-15	8519/4061/9636/4599/10410/6772/5610/3669/10581/10346/4938/684/91543/103/5359/3434/3965	17
BP	GO:0045069	regulation of viral genome replication	13/91	83/18862	1.26585e-16	7.06613e-15	5.98183e-15	8519/9636/4599/10410/5610/3669/10581/4938/684/91543/103/5359/3434	13
BP	GO:0019058	viral life cycle	19/91	348/18862	3.76911e-15	2.03142e-13	1.7197e-13	8519/4061/3429/9636/4599/10410/5610/6233/3669/10581/10346/4938/684/91543/103/5359/3434/5093/3965	19
BP	GO:0034341	response to interferon-gamma	14/91	197/18862	6.09788e-13	3.177e-11	2.68949e-11	8519/4502/23521/10410/6772/3665/6672/10581/10346/83666/4938/684/2597/3965	14
BP	GO:0035455	response to interferon-alpha	7/91	21/18862	5.29325e-12	2.66882e-10	2.25929e-10	8519/10410/5610/10581/3437/684/103	7
BP	GO:0035456	response to interferon-beta	7/91	31/18862	1.15118e-10	5.62282e-09	4.76e-09	8519/54739/10410/6772/10581/684/5359	7
BP	GO:0022613	ribonucleoprotein complex biogenesis	16/91	473/18862	8.80043e-10	4.16821e-08	3.5286e-08	6208/23521/6128/3669/6187/6194/6201/51386/4736/6232/103/6122/6217/6125/6147/6129	16
BP	GO:0002181	cytoplasmic translation	9/91	102/18862	1.49946e-09	6.8931e-08	5.83535e-08	23521/6128/6231/6173/6181/51386/1938/4736/6139	9
BP	GO:0042254	ribosome biogenesis	13/91	307/18862	2.68611e-09	1.19954e-07	1.01547e-07	6208/6128/3669/6187/6194/6201/4736/6232/6122/6217/6125/6147/6129	13
BP	GO:0071346	cellular response to interferon-gamma	10/91	177/18862	1.36853e-08	5.94171e-07	5.02996e-07	4502/23521/6772/3665/6672/10346/83666/4938/2597/3965	10
BP	GO:0046596	regulation of viral entry into host cell	6/91	41/18862	4.18838e-08	1.76931e-06	1.49781e-06	8519/4061/10410/10581/10346/3965	6
BP	GO:1903901	negative regulation of viral life cycle	5/91	24/18862	9.24688e-08	3.80339e-06	3.21976e-06	8519/4061/10410/10581/684	5
BP	GO:0052372	modulation by symbiont of entry into host	6/91	48/18862	1.11257e-07	4.45884e-06	3.77463e-06	8519/4061/10410/10581/10346/3965	6
BP	GO:0006364	rRNA processing	10/91	228/18862	1.49441e-07	5.83942e-06	4.94336e-06	6208/3669/6187/6194/6201/4736/6232/6217/6125/6129	10
BP	GO:0016072	rRNA metabolic process	10/91	238/18862	2.22611e-07	8.48637e-06	7.18414e-06	6208/3669/6187/6194/6201/4736/6232/6217/6125/6129	10
BP	GO:0060333	interferon-gamma-mediated signaling pathway	7/91	91/18862	2.80373e-07	1.04339e-05	8.83282e-06	4502/6772/3665/6672/10346/83666/4938	7
BP	GO:0042255	ribosome assembly	6/91	64/18862	6.38984e-07	2.32263e-05	1.96622e-05	6208/6128/6232/6122/6125/6147	6
BP	GO:0051092	positive regulation of NF-kappaB transcription factor activity	8/91	159/18862	1.00394e-06	3.56626e-05	3.01902e-05	6279/6280/5610/6188/6233/10346/5687/3965	8
BP	GO:0051701	biological process involved in interaction with host	9/91	219/18862	1.118e-06	3.88319e-05	3.28731e-05	8519/4061/10410/5610/10581/10346/5359/3434/3965	9
BP	GO:0042273	ribosomal large subunit biogenesis	6/91	72/18862	1.29106e-06	4.3868e-05	3.71364e-05	6128/4736/6122/6125/6147/6129	6
BP	GO:0022618	ribonucleoprotein complex assembly	9/91	224/18862	1.3483e-06	4.48381e-05	3.79577e-05	6208/23521/6128/51386/6232/103/6122/6125/6147	9
BP	GO:0071826	ribonucleoprotein complex subunit organization	9/91	231/18862	1.73898e-06	5.66255e-05	4.79363e-05	6208/23521/6128/51386/6232/103/6122/6125/6147	9
BP	GO:0046597	negative regulation of viral entry into host cell	4/91	20/18862	2.31508e-06	7.38463e-05	6.25146e-05	8519/4061/10410/10581	4
BP	GO:0045088	regulation of innate immune response	10/91	315/18862	2.84522e-06	8.89417e-05	7.52936e-05	6772/3665/5721/83666/22914/6421/103/5359/5687/3965	10
BP	GO:0034470	ncRNA processing	11/91	400/18862	3.51848e-06	0.000107831	9.12843e-05	6208/3669/6187/6194/6201/4736/6232/103/6217/6125/6129	11
BP	GO:0046718	viral entry into host cell	7/91	140/18862	5.13935e-06	0.000154477	0.000130773	8519/4061/10410/10581/10346/5359/3965	7
BP	GO:0002831	regulation of response to biotic stimulus	11/91	420/18862	5.60058e-06	0.000165164	0.00013982	6772/3665/5721/83666/22914/6421/103/5359/3434/5687/3965	11
BP	GO:0097193	intrinsic apoptotic signaling pathway	9/91	283/18862	9.07628e-06	0.000261915	0.000221724	6279/2537/6280/6188/9709/6201/6421/54541/51246	9
BP	GO:0044409	entry into host	7/91	153/18862	9.21645e-06	0.000261915	0.000221724	8519/4061/10410/10581/10346/5359/3965	7
BP	GO:0000027	ribosomal large subunit assembly	4/91	28/18862	9.49898e-06	0.000265123	0.00022444	6128/6122/6125/6147	4
BP	GO:2001244	positive regulation of intrinsic apoptotic signaling pathway	5/91	60/18862	1.03631e-05	0.000284166	0.000240561	6279/6280/6188/6201/6421	5
BP	GO:0052126	movement in host environment	7/91	175/18862	2.20538e-05	0.000594313	0.000503116	8519/4061/10410/10581/10346/5359/3965	7
BP	GO:0034660	ncRNA metabolic process	11/91	492/18862	2.45324e-05	0.0006499	0.000550173	6208/3669/6187/6194/6201/4736/6232/103/6217/6125/6129	11
BP	GO:0042274	ribosomal small subunit biogenesis	5/91	75/18862	3.09384e-05	0.000805946	0.000682274	6208/6194/6201/6232/6217	5
BP	GO:0051091	positive regulation of DNA-binding transcription factor activity	8/91	266/18862	4.35672e-05	0.00111632	0.000945021	6279/6280/5610/6188/6233/10346/5687/3965	8
BP	GO:0051090	regulation of DNA-binding transcription factor activity	10/91	444/18862	5.53357e-05	0.00139499	0.00118093	6279/6280/5610/6188/6233/6672/10346/9908/5687/3965	10
BP	GO:0017014	protein nitrosylation	3/91	16/18862	5.81296e-05	0.00141963	0.00120179	6279/6280/2597	3
BP	GO:0018119	peptidyl-cysteine S-nitrosylation	3/91	16/18862	5.81296e-05	0.00141963	0.00120179	6279/6280/2597	3
BP	GO:0031349	positive regulation of defense response	9/91	361/18862	6.14528e-05	0.0014777	0.00125095	6279/6280/3665/5721/83666/22914/6421/5359/5687	9
BP	GO:0045089	positive regulation of innate immune response	7/91	223/18862	0.0001025	0.00242737	0.00205489	3665/5721/83666/22914/6421/5359/5687	7
BP	GO:2001242	regulation of intrinsic apoptotic signaling pathway	6/91	160/18862	0.000124747	0.00291014	0.00246358	6279/6280/6188/9709/6201/6421	6
BP	GO:0048872	homeostasis of number of cells	7/91	249/18862	0.000202511	0.00465477	0.0039405	6208/9636/6772/6194/1831/103/3965	7
BP	GO:0006417	regulation of translation	9/91	425/18862	0.000210857	0.00477637	0.00404343	6208/23521/5610/6188/1938/6125/2597/6191/678	9
BP	GO:0052548	regulation of endopeptidase activity	9/91	426/18862	0.000214564	0.00479091	0.00405574	6279/2537/6280/6188/9709/5721/684/2597/3965	9
BP	GO:0030218	erythrocyte differentiation	5/91	115/18862	0.000236468	0.00520562	0.00440682	6208/9636/6772/6194/103	5
BP	GO:0002833	positive regulation of response to biotic stimulus	7/91	258/18862	0.000251482	0.00545926	0.00462154	3665/5721/83666/22914/6421/5359/5687	7
BP	GO:2001233	regulation of apoptotic signaling pathway	8/91	348/18862	0.000278224	0.00595703	0.00504293	6279/2537/6280/6188/9709/6672/6201/6421	8
BP	GO:0034101	erythrocyte homeostasis	5/91	121/18862	0.000299424	0.00632432	0.00535386	6208/9636/6772/6194/103	5
BP	GO:0052547	regulation of peptidase activity	9/91	455/18862	0.000348271	0.00725796	0.00614423	6279/2537/6280/6188/9709/5721/684/2597/3965	9
BP	GO:2001235	positive regulation of apoptotic signaling pathway	5/91	126/18862	0.000360971	0.00742365	0.0062845	6279/6280/6188/6201/6421	5
BP	GO:0098586	cellular response to virus	4/91	71/18862	0.000384822	0.00781139	0.00661273	2537/3665/103/3965	4
BP	GO:0031396	regulation of protein ubiquitination	6/91	205/18862	0.000474077	0.00935418	0.00791878	9636/6188/9709/6187/6201/6125	6
BP	GO:0043281	regulation of cysteine-type endopeptidase activity involved in apoptotic process	6/91	205/18862	0.000474077	0.00935418	0.00791878	6279/2537/6280/6188/9709/3965	6
BP	GO:0006414	translational elongation	5/91	134/18862	0.000478781	0.00935418	0.00791878	1915/1937/6181/1938/64975	5
BP	GO:0031397	negative regulation of protein ubiquitination	4/91	79/18862	0.00057787	0.0111507	0.00943966	9636/6188/6201/6125	4
BP	GO:0034248	regulation of cellular amide metabolic process	9/91	494/18862	0.000630451	0.012017	0.010173	6208/23521/5610/6188/1938/6125/2597/6191/678	9
BP	GO:0002262	myeloid cell homeostasis	5/91	145/18862	0.000685406	0.0128609	0.0108874	6208/9636/6772/6194/103	5
BP	GO:0043029	T cell homeostasis	3/91	36/18862	0.000691179	0.0128609	0.0108874	6194/1831/3965	3
BP	GO:0006882	cellular zinc ion homeostasis	3/91	38/18862	0.000810968	0.0149123	0.012624	6279/6280/4502	3
BP	GO:2000116	regulation of cysteine-type endopeptidase activity	6/91	230/18862	0.000866071	0.0157287	0.0133151	6279/2537/6280/6188/9709/3965	6
BP	GO:0050832	defense response to fungus	3/91	39/18862	0.000875495	0.0157287	0.0133151	6279/6280/2597	3
BP	GO:0055069	zinc ion homeostasis	3/91	40/18862	0.000943192	0.0167524	0.0141817	6279/6280/4502	3
BP	GO:0002224	toll-like receptor signaling pathway	5/91	157/18862	0.000980177	0.0170839	0.0144624	6279/6280/3665/6233/91543	5
BP	GO:1903321	negative regulation of protein modification by small protein conjugation or removal	4/91	91/18862	0.00098372	0.0170839	0.0144624	9636/6188/6201/6125	4
BP	GO:1903320	regulation of protein modification by small protein conjugation or removal	6/91	237/18862	0.00101128	0.0173696	0.0147043	9636/6188/9709/6187/6201/6125	6
BP	GO:0019985	translesion synthesis	3/91	42/18862	0.00108833	0.0184319	0.0156035	9636/6233/9246	3
BP	GO:0002244	hematopoietic progenitor cell differentiation	5/91	161/18862	0.00109672	0.0184319	0.0156035	5610/5721/1938/103/5687	5
BP	GO:0032602	chemokine production	4/91	95/18862	0.00115473	0.0192005	0.0162541	6279/6280/5610/3965	4
BP	GO:0071887	leukocyte apoptotic process	4/91	102/18862	0.00150244	0.0247192	0.020926	3665/6194/1831/3965	4
BP	GO:0018198	peptidyl-cysteine modification	3/91	48/18862	0.00160585	0.0261453	0.0221333	6279/6280/2597	3
BP	GO:0070231	T cell apoptotic process	3/91	49/18862	0.00170465	0.0274677	0.0232528	6194/1831/3965	3
BP	GO:0070486	leukocyte aggregation	2/91	13/18862	0.0017346	0.0276651	0.0234199	6279/6280	2
BP	GO:0010950	positive regulation of endopeptidase activity	5/91	182/18862	0.00188444	0.0297513	0.025186	6279/6280/6188/5721/3965	5
BP	GO:0006301	postreplication repair	3/91	52/18862	0.00202357	0.0313198	0.0265138	9636/6233/9246	3
BP	GO:0038061	NIK/NF-kappaB signaling	5/91	185/18862	0.00202386	0.0313198	0.0265138	5610/6188/5721/5687/3965	5
BP	GO:2000736	regulation of stem cell differentiation	4/91	112/18862	0.00211709	0.0318189	0.0269363	5610/5721/678/5687	4
BP	GO:0000731	DNA synthesis involved in DNA repair	3/91	53/18862	0.00213755	0.0318189	0.0269363	9636/6233/9246	3
BP	GO:0009620	response to fungus	3/91	53/18862	0.00213755	0.0318189	0.0269363	6279/6280/2597	3
BP	GO:0051438	regulation of ubiquitin-protein transferase activity	3/91	53/18862	0.00213755	0.0318189	0.0269363	6187/6201/6125	3
BP	GO:0007249	I-kappaB kinase/NF-kappaB signaling	6/91	282/18862	0.00244074	0.0359895	0.0304669	6772/6233/10346/684/51246/3965	6
BP	GO:0002260	lymphocyte homeostasis	3/91	57/18862	0.00263308	0.037908	0.0320911	6194/1831/3965	3
BP	GO:0051238	sequestering of metal ion	2/91	16/18862	0.00264362	0.037908	0.0320911	6279/6280	2
BP	GO:0051444	negative regulation of ubiquitin-protein transferase activity	2/91	16/18862	0.00264362	0.037908	0.0320911	6201/6125	2
BP	GO:0010952	positive regulation of peptidase activity	5/91	200/18862	0.00283661	0.0403056	0.0341207	6279/6280/6188/5721/3965	5
BP	GO:0017148	negative regulation of translation	5/91	206/18862	0.00321997	0.0453406	0.0383831	23521/5610/6188/2597/678	5
BP	GO:0002523	leukocyte migration involved in inflammatory response	2/91	18/18862	0.00334955	0.0464153	0.0392928	6279/6280	2
BP	GO:0002221	pattern recognition receptor signaling pathway	5/91	208/18862	0.00335568	0.0464153	0.0392928	6279/6280/3665/6233/91543	5
BP	GO:0032479	regulation of type I interferon production	4/91	128/18862	0.00343031	0.0470314	0.0398144	9636/6772/3665/9246	4
BP	GO:0032606	type I interferon production	4/91	129/18862	0.00352721	0.0479394	0.0405831	9636/6772/3665/9246	4
BP	GO:0002544	chronic inflammatory response	2/91	19/18862	0.0037319	0.0494319	0.0418466	6279/6280	2
BP	GO:0002689	negative regulation of leukocyte chemotaxis	2/91	19/18862	0.0037319	0.0494319	0.0418466	22914/1843	2
BP	GO:0060216	definitive hemopoiesis	2/91	19/18862	0.0037319	0.0494319	0.0418466	103/678	2
CC	GO:0022626	cytosolic ribosome	28/92	107/19520	2.57092e-42	3.67642e-40	3.08511e-40	6208/6224/6189/9636/23521/6128/6188/6233/6124/6187/6231/6194/6173/6201/6157/6181/4736/6139/6232/6137/6144/6122/6217/6125/6147/6191/6129/6164	28
CC	GO:0044391	ribosomal subunit	29/92	187/19520	1.28579e-36	9.17383e-35	7.69832e-35	6208/6224/6189/9636/23521/6128/6188/6233/6124/6187/6231/6194/6173/6201/6157/6181/4736/6139/6232/6137/6144/6122/6217/6125/6147/6191/64975/6129/6164	29
CC	GO:0005840	ribosome	31/92	243/19520	1.92458e-36	9.17383e-35	7.69832e-35	6208/6224/6189/9636/23521/6128/5610/6188/6233/6124/6187/6231/6194/6173/6201/6157/6181/1938/4736/6139/6232/6137/6144/6122/6217/6125/6147/6191/64975/6129/6164	31
CC	GO:0022625	cytosolic large ribosomal subunit	15/92	57/19520	7.14291e-23	2.55359e-21	2.14287e-21	23521/6128/6124/6173/6157/6181/4736/6139/6137/6144/6122/6125/6147/6129/6164	15
CC	GO:0022627	cytosolic small ribosomal subunit	13/92	46/19520	2.09994e-20	6.00584e-19	5.03987e-19	6208/6224/6189/9636/6188/6233/6187/6231/6194/6201/6232/6217/6191	13
CC	GO:0015934	large ribosomal subunit	16/92	115/19520	1.55454e-19	3.705e-18	3.10909e-18	23521/6128/6124/6173/6157/6181/4736/6139/6137/6144/6122/6125/6147/64975/6129/6164	16
CC	GO:0015935	small ribosomal subunit	13/92	74/19520	1.94309e-17	3.96946e-16	3.33102e-16	6208/6224/6189/9636/6188/6233/6187/6231/6194/6201/6232/6217/6191	13
CC	GO:0005844	polysome	9/92	68/19520	3.0165e-11	5.392e-10	4.52475e-10	6128/6188/6231/6194/6173/1938/4736/6191/5687	9
CC	GO:0005925	focal adhesion	15/92	416/19520	9.70478e-10	1.54198e-08	1.29397e-08	6208/6189/23521/6128/6188/6124/6187/6201/6181/4736/6122/6217/6125/6191/6129	15
CC	GO:0030055	cell-substrate junction	15/92	423/19520	1.21935e-09	1.74367e-08	1.46322e-08	6208/6189/23521/6128/6188/6124/6187/6201/6181/4736/6122/6217/6125/6191/6129	15
CC	GO:0042788	polysomal ribosome	5/92	32/19520	3.79461e-07	4.933e-06	4.13958e-06	6128/6231/6173/1938/4736	5
CC	GO:0036464	cytoplasmic ribonucleoprotein granule	6/92	234/19520	0.000840934	0.0100211	0.00840934	6128/6194/6191/9908/5093/5687	6
CC	GO:0035770	ribonucleoprotein granule	6/92	244/19520	0.00104398	0.0114838	0.00963674	6128/6194/6191/9908/5093/5687	6
CC	GO:0014069	postsynaptic density	6/92	313/19520	0.00364377	0.0372185	0.0312323	6208/4599/6128/6188/6232/6129	6
CC	GO:0032279	asymmetric synapse	6/92	318/19520	0.0039362	0.0375251	0.0314896	6208/4599/6128/6188/6232/6129	6
CC	GO:0099572	postsynaptic specialization	6/92	333/19520	0.00491841	0.0439583	0.0368881	6208/4599/6128/6188/6232/6129	6
CC	GO:0005791	rough endoplasmic reticulum	3/92	75/19520	0.00535515	0.0443954	0.0372549	6128/6124/6231	3
CC	GO:0098984	neuron to neuron synapse	6/92	342/19520	0.00558823	0.0443954	0.0372549	6208/4599/6128/6188/6232/6129	6
MF	GO:0003735	structural constituent of ribosome	28/91	180/18337	8.91518e-35	2.04158e-32	1.82057e-32	6208/6224/6189/23521/6128/6188/6233/6124/6187/6231/6194/6173/6201/6157/6181/4736/6139/6232/6137/6144/6122/6217/6125/6147/6191/64975/6129/6164	28
MF	GO:0019843	rRNA binding	7/91	64/18337	2.89481e-08	3.31455e-06	2.95575e-06	6208/6188/1938/6122/6125/6147/6191	7
MF	GO:0045296	cadherin binding	10/91	332/18337	5.80071e-06	0.000442787	0.000394855	6128/6772/6187/6231/1937/6282/1938/6147/6164/5093	10
MF	GO:0048027	mRNA 5'-UTR binding	4/91	26/18337	7.8042e-06	0.000446791	0.000398425	6208/6189/6201/6125	4
MF	GO:0008097	5S rRNA binding	3/91	11/18337	1.8955e-05	0.000868137	0.000774161	1938/6122/6125	3
MF	GO:0045182	translation regulator activity	6/91	138/18337	6.42596e-05	0.00245257	0.00218708	6208/1915/5610/1937/51386/1938	6
MF	GO:0003746	translation elongation factor activity	3/91	19/18337	0.000108159	0.00353834	0.00315531	1915/1937/1938	3
MF	GO:0008135	translation factor activity, RNA binding	4/91	84/18337	0.000808897	0.0231547	0.0206482	1915/1937/51386/1938	4
MF	GO:0044389	ubiquitin-like protein ligase binding	7/91	312/18337	0.00092161	0.0234499	0.0209114	9636/6772/10628/6233/83666/9246/6125	7
MF	GO:0050786	RAGE receptor binding	2/91	10/18337	0.00106811	0.0244597	0.021812	6279/6280	2
MF	GO:0035325	Toll-like receptor binding	2/91	12/18337	0.00155647	0.0322984	0.0288021	6279/6280	2
MF	GO:0031386	protein tag	2/91	13/18337	0.00183354	0.0322984	0.0288021	9636/6233	2
MF	GO:0036041	long-chain fatty acid binding	2/91	13/18337	0.00183354	0.0322984	0.0288021	6279/6280	2
MF	GO:0090079	translation regulator activity, nucleic acid binding	4/91	108/18337	0.00205274	0.0335769	0.0299422	1915/1937/51386/1938	4

## Sheet: CD8+T cell_KEGG
ID	Description	GeneRatio	BgRatio	pvalue	p.adjust	qvalue	geneID	Count
hsa05171	Coronavirus disease - COVID-19	33/63	232/8105	4.80167e-35	4.51357e-33	4.34678e-33	6208/6224/6189/9636/4599/23521/6128/6772/5610/6188/6233/6124/6187/6231/6194/6173/6201/6157/6181/4938/4736/6139/6232/103/6137/6144/6122/6217/6125/6147/6191/6129/6164	33
hsa03010	Ribosome	27/63	158/8105	1.84221e-30	8.65838e-29	8.33841e-29	6208/6224/6189/23521/6128/6188/6233/6124/6187/6231/6194/6173/6201/6157/6181/4736/6139/6232/6137/6144/6122/6217/6125/6147/6191/6129/6164	27
hsa05160	Hepatitis C	7/63	157/8105	0.000199355	0.00624646	0.00601562	4599/6772/3665/5610/4938/91543/3434	7
hsa05164	Influenza A	7/63	172/8105	0.000348887	0.00819885	0.00789587	4599/6772/3665/5610/4938/91543/103	7
hsa05162	Measles	6/63	139/8105	0.0006953	0.0130716	0.0125886	4599/6772/3665/5610/4938/103	6

## Sheet: natural killer cell_GO
ONTOLOGY	ID	Description	GeneRatio	BgRatio	pvalue	p.adjust	qvalue	geneID	Count
BP	GO:0060337	type I interferon signaling pathway	18/63	95/18862	1.70744e-27	1.44252e-24	1.1289e-24	9636/2537/4599/8519/10410/3669/54739/3429/3665/6772/4938/684/3437/10581/6672/91543/8638/3430	18
BP	GO:0071357	cellular response to type I interferon	18/63	96/18862	2.09669e-27	1.44252e-24	1.1289e-24	9636/2537/4599/8519/10410/3669/54739/3429/3665/6772/4938/684/3437/10581/6672/91543/8638/3430	18
BP	GO:0034340	response to type I interferon	18/63	101/18862	5.65535e-27	2.59392e-24	2.02997e-24	9636/2537/4599/8519/10410/3669/54739/3429/3665/6772/4938/684/3437/10581/6672/91543/8638/3430	18
BP	GO:0009615	response to virus	23/63	359/18862	6.24176e-24	2.14717e-21	1.68035e-21	10964/9636/2537/4599/8519/10410/3669/3429/3665/5610/6772/54541/7178/4938/684/3437/10581/10561/5359/83666/91543/6375/8638	23
BP	GO:0051607	defense response to virus	20/63	260/18862	2.33564e-22	5.35639e-20	4.19185e-20	10964/9636/2537/4599/8519/10410/3669/3429/3665/5610/6772/54541/4938/684/3437/10581/5359/83666/91543/8638	20
BP	GO:0140546	defense response to symbiont	20/63	260/18862	2.33564e-22	5.35639e-20	4.19185e-20	10964/9636/2537/4599/8519/10410/3669/3429/3665/5610/6772/54541/4938/684/3437/10581/5359/83666/91543/8638	20
BP	GO:0048525	negative regulation of viral process	14/63	89/18862	2.88688e-20	5.67478e-18	4.44102e-18	4061/9636/4599/8519/10410/3669/5610/6772/4938/684/10581/5359/91543/8638	14
BP	GO:0045071	negative regulation of viral genome replication	12/63	54/18862	1.95307e-19	3.35928e-17	2.62894e-17	9636/4599/8519/10410/3669/5610/4938/684/10581/5359/91543/8638	12
BP	GO:0006614	SRP-dependent cotranslational protein targeting to membrane	14/63	105/18862	3.33749e-19	5.10265e-17	3.99328e-17	6189/6187/6164/6233/6208/6134/6227/6157/6188/6224/6232/6128/6231/6181	14
BP	GO:0006613	cotranslational protein targeting to membrane	14/63	110/18862	6.60184e-19	9.08413e-17	7.10913e-17	6189/6187/6164/6233/6208/6134/6227/6157/6188/6224/6232/6128/6231/6181	14
BP	GO:0000184	nuclear-transcribed mRNA catabolic process, nonsense-mediated decay	14/63	120/18862	2.34763e-18	2.69194e-16	2.10668e-16	6189/6187/6164/6233/6208/6134/6227/6157/6188/6224/6232/6128/6231/6181	14
BP	GO:0045047	protein targeting to ER	14/63	120/18862	2.34763e-18	2.69194e-16	2.10668e-16	6189/6187/6164/6233/6208/6134/6227/6157/6188/6224/6232/6128/6231/6181	14
BP	GO:0072599	establishment of protein localization to endoplasmic reticulum	14/63	124/18862	3.77778e-18	3.99863e-16	3.12928e-16	6189/6187/6164/6233/6208/6134/6227/6157/6188/6224/6232/6128/6231/6181	14
BP	GO:0019083	viral transcription	15/63	180/18862	2.25019e-17	2.21162e-15	1.73079e-15	6189/10410/6187/6164/6233/6208/6134/6227/6157/6188/6224/6232/6128/6231/6181	15
BP	GO:0050792	regulation of viral process	15/63	186/18862	3.69986e-17	3.39401e-15	2.65611e-15	4061/9636/4599/8519/10410/3669/5610/6772/3956/4938/684/10581/5359/91543/8638	15
BP	GO:1903900	regulation of viral life cycle	14/63	148/18862	4.81912e-17	4.14444e-15	3.2434e-15	4061/9636/4599/8519/10410/3669/5610/3956/4938/684/10581/5359/91543/8638	14
BP	GO:0045069	regulation of viral genome replication	12/63	83/18862	5.12821e-17	4.15083e-15	3.2484e-15	9636/4599/8519/10410/3669/5610/4938/684/10581/5359/91543/8638	12
BP	GO:0006413	translational initiation	15/63	193/18862	6.47003e-17	4.94598e-15	3.87067e-15	6189/6187/6164/5610/6233/6208/6134/6227/6157/6188/6224/6232/6128/6231/6181	15
BP	GO:0070972	protein localization to endoplasmic reticulum	14/63	152/18862	7.05263e-17	5.10759e-15	3.99714e-15	6189/6187/6164/6233/6208/6134/6227/6157/6188/6224/6232/6128/6231/6181	14
BP	GO:0043903	regulation of biological process involved in symbiotic interaction	15/63	197/18862	8.81874e-17	6.06729e-15	4.74819e-15	4061/9636/4599/8519/10410/3669/5610/6772/3956/4938/684/10581/5359/91543/8638	15
BP	GO:0019080	viral gene expression	15/63	198/18862	9.51863e-17	6.23697e-15	4.88098e-15	6189/10410/6187/6164/6233/6208/6134/6227/6157/6188/6224/6232/6128/6231/6181	15
BP	GO:0019079	viral genome replication	13/63	129/18862	3.0247e-16	1.89181e-14	1.48051e-14	9636/4599/8519/10410/3669/3429/5610/4938/684/10581/5359/91543/8638	13
BP	GO:0000956	nuclear-transcribed mRNA catabolic process	14/63	208/18862	5.88538e-15	3.52099e-13	2.75549e-13	6189/6187/6164/6233/6208/6134/6227/6157/6188/6224/6232/6128/6231/6181	14
BP	GO:0006612	protein targeting to membrane	14/63	211/18862	7.18582e-15	4.11987e-13	3.22417e-13	6189/6187/6164/6233/6208/6134/6227/6157/6188/6224/6232/6128/6231/6181	14
BP	GO:0019058	viral life cycle	16/63	348/18862	2.1348e-14	1.17499e-12	9.19538e-13	4061/9636/4599/8519/10410/3669/3429/5610/6233/3956/4938/684/10581/5359/91543/8638	16
BP	GO:0006401	RNA catabolic process	16/63	414/18862	3.10635e-13	1.64398e-11	1.28656e-11	6189/3669/6187/6164/6233/6208/5721/6134/6227/6157/6188/6224/6232/6128/6231/6181	16
BP	GO:0090150	establishment of protein localization to membrane	15/63	354/18862	5.07587e-13	2.58681e-11	2.02441e-11	6189/6187/6164/3002/6233/6208/6134/6227/6157/6188/6224/6232/6128/6231/6181	15
BP	GO:0006402	mRNA catabolic process	15/63	375/18862	1.16475e-12	5.72389e-11	4.47946e-11	6189/6187/6164/6233/6208/5721/6134/6227/6157/6188/6224/6232/6128/6231/6181	15
BP	GO:0034341	response to interferon-gamma	12/63	197/18862	2.0154e-12	9.56274e-11	7.48369e-11	8519/10410/4502/3665/6772/4938/684/10581/6672/83666/6375/8638	12
BP	GO:0035456	response to interferon-beta	7/63	31/18862	8.11893e-12	3.72388e-10	2.91427e-10	8519/10410/54739/6772/684/10581/5359	7
BP	GO:0035455	response to interferon-alpha	6/63	21/18862	5.67445e-11	2.51872e-09	1.97113e-09	8519/10410/5610/684/3437/10581	6
BP	GO:0006605	protein targeting	14/63	441/18862	1.56299e-10	6.72085e-09	5.25966e-09	6189/6187/6164/6233/6208/6134/6227/6157/6188/6224/6232/6128/6231/6181	14
BP	GO:1903901	negative regulation of viral life cycle	5/63	24/18862	1.43092e-08	5.9665e-07	4.66931e-07	4061/8519/10410/684/10581	5
BP	GO:0060333	interferon-gamma-mediated signaling pathway	7/63	91/18862	2.13772e-08	8.65149e-07	6.77056e-07	4502/3665/6772/4938/6672/83666/8638	7
BP	GO:0071346	cellular response to interferon-gamma	8/63	177/18862	1.2802e-07	5.03303e-06	3.93879e-06	4502/3665/6772/4938/6672/83666/6375/8638	8
BP	GO:0046596	regulation of viral entry into host cell	5/63	41/18862	2.41526e-07	9.23167e-06	7.2246e-06	4061/8519/10410/3956/10581	5
BP	GO:0046597	negative regulation of viral entry into host cell	4/63	20/18862	5.25882e-07	1.95571e-05	1.53052e-05	4061/8519/10410/10581	4
BP	GO:0052372	modulation by symbiont of entry into host	5/63	48/18862	5.4205e-07	1.96279e-05	1.53606e-05	4061/8519/10410/3956/10581	5
BP	GO:0046718	viral entry into host cell	6/63	140/18862	7.20617e-06	0.000254249	0.000198972	4061/8519/10410/3956/10581/5359	6
BP	GO:0051701	biological process involved in interaction with host	7/63	219/18862	8.23512e-06	0.000283288	0.000221698	4061/8519/10410/5610/3956/10581/5359	7
BP	GO:0044409	entry into host	6/63	153/18862	1.19816e-05	0.000402113	0.000314689	4061/8519/10410/3956/10581/5359	6
BP	GO:0002224	toll-like receptor signaling pathway	6/63	157/18862	1.38795e-05	0.00045472	0.000355858	6279/6280/3665/6233/91543/3430	6
BP	GO:0002181	cytoplasmic translation	5/63	102/18862	2.29613e-05	0.000734763	0.000575017	1938/6227/6128/6231/6181	5
BP	GO:0052126	movement in host environment	6/63	175/18862	2.56639e-05	0.000788068	0.000616733	4061/8519/10410/3956/10581/5359	6
BP	GO:0031349	positive regulation of defense response	8/63	361/18862	2.57726e-05	0.000788068	0.000616733	6279/6280/3665/2207/5721/5359/83666/3430	8
BP	GO:0032069	regulation of nuclease activity	3/63	22/18862	5.22633e-05	0.00156335	0.00122346	4938/6188/8638	3
BP	GO:0042255	ribosome assembly	4/63	64/18862	6.17801e-05	0.00180871	0.00141548	6208/6134/6232/6128	4
BP	GO:0002221	pattern recognition receptor signaling pathway	6/63	208/18862	6.73582e-05	0.00193094	0.00151113	6279/6280/3665/6233/91543/3430	6
BP	GO:0042254	ribosome biogenesis	7/63	307/18862	7.16412e-05	0.0020118	0.00157441	3669/6187/6208/6134/6227/6232/6128	7
BP	GO:0045088	regulation of innate immune response	7/63	315/18862	8.41565e-05	0.00231599	0.00181247	3665/6772/2207/5721/5359/83666/3430	7
BP	GO:0045089	positive regulation of innate immune response	6/63	223/18862	9.88833e-05	0.00266791	0.00208788	3665/2207/5721/5359/83666/3430	6
BP	GO:0051092	positive regulation of NF-kappaB transcription factor activity	5/63	159/18862	0.000189383	0.00501137	0.00392184	6279/6280/5610/6233/6188	5
BP	GO:0002833	positive regulation of response to biotic stimulus	6/63	258/18862	0.000218631	0.00567616	0.0044421	3665/2207/5721/5359/83666/3430	6
BP	GO:0006882	cellular zinc ion homeostasis	3/63	38/18862	0.000275591	0.00702246	0.0054957	6279/6280/4502	3
BP	GO:0055069	zinc ion homeostasis	3/63	40/18862	0.000321232	0.00803664	0.00628938	6279/6280/4502	3
BP	GO:0097193	intrinsic apoptotic signaling pathway	6/63	283/18862	0.000358839	0.00881718	0.00690023	6279/2537/6280/54541/7178/6188	6
BP	GO:0030593	neutrophil chemotaxis	4/63	103/18862	0.000390061	0.0094162	0.00736901	6279/6280/2207/6375	4
BP	GO:0002831	regulation of response to biotic stimulus	7/63	420/18862	0.00048785	0.0115738	0.00905754	3665/6772/2207/5721/5359/83666/3430	7
BP	GO:2000551	regulation of T-helper 2 cell cytokine production	2/63	11/18862	0.000592261	0.0138127	0.0108097	91543/6375	2
BP	GO:0001819	positive regulation of cytokine production	7/63	437/18862	0.00061738	0.0141586	0.0110804	3665/5610/6772/2207/6188/91543/6375	7
BP	GO:0051651	maintenance of location in cell	5/63	209/18862	0.000664246	0.0149837	0.011726	6279/6280/6672/9168/6375	5
BP	GO:0051090	regulation of DNA-binding transcription factor activity	7/63	444/18862	0.000678087	0.0150492	0.0117773	6279/6280/5610/6233/6672/6188/6375	7
BP	GO:1990266	neutrophil migration	4/63	123/18862	0.000762062	0.0166444	0.0130257	6279/6280/2207/6375	4
BP	GO:0071621	granulocyte chemotaxis	4/63	124/18862	0.000785509	0.0168884	0.0132167	6279/6280/2207/6375	4
BP	GO:0035745	T-helper 2 cell cytokine production	2/63	13/18862	0.000836324	0.0174361	0.0136453	91543/6375	2
BP	GO:0070486	leukocyte aggregation	2/63	13/18862	0.000836324	0.0174361	0.0136453	6279/6280	2
BP	GO:0006364	rRNA processing	5/63	228/18862	0.000981754	0.0198723	0.0155518	3669/6187/6208/6227/6232	5
BP	GO:0022613	ribonucleoprotein complex biogenesis	7/63	473/18862	0.000982059	0.0198723	0.0155518	3669/6187/6208/6134/6227/6232/6128	7
BP	GO:0042742	defense response to bacterium	6/63	344/18862	0.000998199	0.0199061	0.0155783	9636/6279/6280/2207/3500/3512	6
BP	GO:2001233	regulation of apoptotic signaling pathway	6/63	348/18862	0.00105944	0.0205621	0.0160916	6279/2537/6280/7178/6672/6188	6
BP	GO:2001244	positive regulation of intrinsic apoptotic signaling pathway	3/63	60/18862	0.00106098	0.0205621	0.0160916	6279/6280/6188	3
BP	GO:0043312	neutrophil degranulation	7/63	485/18862	0.0011356	0.0217027	0.0169843	1915/6279/6280/684/2207/6282/1938	7
BP	GO:0002283	neutrophil activation involved in immune response	7/63	488/18862	0.0011768	0.0220979	0.0172936	1915/6279/6280/684/2207/6282/1938	7
BP	GO:0016072	rRNA metabolic process	5/63	238/18862	0.00118841	0.0220979	0.0172936	3669/6187/6208/6227/6232	5
BP	GO:0002449	lymphocyte mediated immunity	6/63	360/18862	0.00126065	0.0222663	0.0174253	3665/3002/2207/91543/3500/6375	6
BP	GO:0002830	positive regulation of type 2 immune response	2/63	16/18862	0.00127837	0.0222663	0.0174253	91543/6375	2
BP	GO:0017014	protein nitrosylation	2/63	16/18862	0.00127837	0.0222663	0.0174253	6279/6280	2
BP	GO:0018119	peptidyl-cysteine S-nitrosylation	2/63	16/18862	0.00127837	0.0222663	0.0174253	6279/6280	2
BP	GO:0051238	sequestering of metal ion	2/63	16/18862	0.00127837	0.0222663	0.0174253	6279/6280	2
BP	GO:0002446	neutrophil mediated immunity	7/63	499/18862	0.001338	0.0229924	0.0179936	1915/6279/6280/684/2207/6282/1938	7
BP	GO:0042119	neutrophil activation	7/63	500/18862	0.00135348	0.0229924	0.0179936	1915/6279/6280/684/2207/6282/1938	7
BP	GO:1901224	positive regulation of NIK/NF-kappaB signaling	3/63	67/18862	0.00146082	0.0245133	0.0191838	5610/6188/3430	3
BP	GO:0070665	positive regulation of leukocyte proliferation	4/63	148/18862	0.00151385	0.0247983	0.0194069	684/6188/952/6375	4
BP	GO:0097530	granulocyte migration	4/63	148/18862	0.00151385	0.0247983	0.0194069	6279/6280/2207/6375	4
BP	GO:0002523	leukocyte migration involved in inflammatory response	2/63	18/18862	0.00162292	0.0259668	0.0203213	6279/6280	2
BP	GO:0035743	CD4-positive, alpha-beta T cell cytokine production	2/63	18/18862	0.00162292	0.0259668	0.0203213	91543/6375	2
BP	GO:0002544	chronic inflammatory response	2/63	19/18862	0.00180996	0.0286265	0.0224028	6279/6280	2
BP	GO:0051091	positive regulation of DNA-binding transcription factor activity	5/63	266/18862	0.00193861	0.0303128	0.0237224	6279/6280/5610/6233/6188	5
BP	GO:0002726	positive regulation of T cell cytokine production	2/63	20/18862	0.00200675	0.030551	0.0239089	91543/6375	2
BP	GO:2001242	regulation of intrinsic apoptotic signaling pathway	4/63	160/18862	0.00201338	0.030551	0.0239089	6279/6280/7178/6188	4
BP	GO:0042274	ribosomal small subunit biogenesis	3/63	75/18862	0.00202045	0.030551	0.0239089	6208/6227/6232	3
BP	GO:0002244	hematopoietic progenitor cell differentiation	4/63	161/18862	0.00205956	0.0308039	0.0241068	5610/5721/1938/5341	4
BP	GO:0034121	regulation of toll-like receptor signaling pathway	3/63	77/18862	0.00217842	0.0322313	0.0252238	3665/91543/3430	3
BP	GO:0000028	ribosomal small subunit assembly	2/63	21/18862	0.00221322	0.0323978	0.0253541	6208/6232	2
BP	GO:0032727	positive regulation of interferon-alpha production	2/63	22/18862	0.00242932	0.0351867	0.0275367	3665/6772	2
BP	GO:0050867	positive regulation of cell activation	6/63	412/18862	0.00249007	0.0354361	0.0277319	3956/6188/952/3500/6375/5341	6
BP	GO:0007249	I-kappaB kinase/NF-kappaB signaling	5/63	282/18862	0.00249804	0.0354361	0.0277319	6233/6772/3956/684/51523	5
BP	GO:0002718	regulation of cytokine production involved in immune response	3/63	84/18862	0.00279096	0.0391873	0.0306675	684/91543/6375	3
BP	GO:0006417	regulation of translation	6/63	425/18862	0.00290467	0.040372	0.0315947	3002/5610/6208/6134/1938/6188	6
BP	GO:0052548	regulation of endopeptidase activity	6/63	426/18862	0.00293858	0.0404349	0.0316439	6279/2537/6280/684/5721/6188	6
BP	GO:0060330	regulation of response to interferon-gamma	2/63	25/18862	0.00313469	0.0422876	0.0330938	6772/83666	2
BP	GO:0060334	regulation of interferon-gamma-mediated signaling pathway	2/63	25/18862	0.00313469	0.0422876	0.0330938	6772/83666	2
BP	GO:0010950	positive regulation of endopeptidase activity	4/63	182/18862	0.00320664	0.0428383	0.0335248	6279/6280/5721/6188	4
BP	GO:0002719	negative regulation of cytokine production involved in immune response	2/63	26/18862	0.00338863	0.0445544	0.0348678	684/6375	2
BP	GO:0038061	NIK/NF-kappaB signaling	4/63	185/18862	0.00339986	0.0445544	0.0348678	5610/5721/6188/3430	4
BP	GO:0034123	positive regulation of toll-like receptor signaling pathway	2/63	27/18862	0.00365187	0.0474055	0.037099	91543/3430	2
BP	GO:0002367	cytokine production involved in immune response	3/63	93/18862	0.00372094	0.0478506	0.0374474	684/91543/6375	3
BP	GO:0050764	regulation of phagocytosis	3/63	94/18862	0.00383454	0.0485315	0.0379802	2207/3560/5359	3
BP	GO:0000027	ribosomal large subunit assembly	2/63	28/18862	0.00392436	0.0485315	0.0379802	6134/6128	2
BP	GO:0032607	interferon-alpha production	2/63	28/18862	0.00392436	0.0485315	0.0379802	3665/6772	2
BP	GO:0032647	regulation of interferon-alpha production	2/63	28/18862	0.00392436	0.0485315	0.0379802	3665/6772	2
BP	GO:0032602	chemokine production	3/63	95/18862	0.00395024	0.0485315	0.0379802	6279/6280/5610	3
BP	GO:0052547	regulation of peptidase activity	6/63	455/18862	0.00405776	0.0494113	0.0386687	6279/2537/6280/684/5721/6188	6
CC	GO:0022626	cytosolic ribosome	15/63	107/19520	4.29958e-21	5.0735e-19	3.80173e-19	9636/6189/6187/6164/6233/6208/6134/6227/6157/6188/6224/6232/6128/6231/6181	15
CC	GO:0005840	ribosome	17/63	243/19520	1.43584e-18	8.47146e-17	6.34792e-17	9636/6189/6187/6164/5610/6233/6208/6134/1938/6227/6157/6188/6224/6232/6128/6231/6181	17
CC	GO:0044391	ribosomal subunit	15/63	187/19520	2.43256e-17	9.56806e-16	7.16964e-16	9636/6189/6187/6164/6233/6208/6134/6227/6157/6188/6224/6232/6128/6231/6181	15
CC	GO:0022627	cytosolic small ribosomal subunit	10/63	46/19520	2.15829e-16	6.36697e-15	4.77097e-15	9636/6189/6187/6233/6208/6227/6188/6224/6232/6231	10
CC	GO:0015935	small ribosomal subunit	10/63	74/19520	3.54897e-14	8.37558e-13	6.27608e-13	9636/6189/6187/6233/6208/6227/6188/6224/6232/6231	10
CC	GO:0022625	cytosolic large ribosomal subunit	5/63	57/19520	1.09608e-06	2.15562e-05	1.61527e-05	6164/6134/6157/6128/6181	5
CC	GO:0005844	polysome	5/63	68/19520	2.65545e-06	4.47634e-05	3.35426e-05	1938/6227/6188/6128/6231	5
CC	GO:0042788	polysomal ribosome	4/63	32/19520	3.30998e-06	4.88222e-05	3.6584e-05	1938/6227/6128/6231	4
CC	GO:0015934	large ribosomal subunit	5/63	115/19520	3.48057e-05	0.000456341	0.00034195	6164/6134/6157/6128/6181	5
CC	GO:0005791	rough endoplasmic reticulum	3/63	75/19520	0.00183346	0.0216348	0.0162116	6227/6128/6231	3
CC	GO:0005925	focal adhesion	6/63	416/19520	0.00220393	0.0223586	0.016754	6189/6187/6208/6188/6128/6181	6
CC	GO:0030055	cell-substrate junction	6/63	423/19520	0.00239534	0.0223586	0.016754	6189/6187/6208/6188/6128/6181	6
CC	GO:0001726	ruffle	4/63	175/19520	0.00246323	0.0223586	0.016754	1915/6282/6188/5341	4
CC	GO:0014069	postsynaptic density	5/63	313/19520	0.00337615	0.0255777	0.0191662	4599/6208/6188/6232/6128	5
CC	GO:0032587	ruffle membrane	3/63	95/19520	0.0035903	0.0255777	0.0191662	1915/6188/5341	3
CC	GO:0032279	asymmetric synapse	5/63	318/19520	0.00361185	0.0255777	0.0191662	4599/6208/6188/6232/6128	5
CC	GO:0034774	secretory granule lumen	5/63	322/19520	0.00380876	0.0255777	0.0191662	1915/6279/6280/6282/1938	5
CC	GO:0060205	cytoplasmic vesicle lumen	5/63	326/19520	0.00401328	0.0255777	0.0191662	1915/6279/6280/6282/1938	5
CC	GO:0031983	vesicle lumen	5/63	328/19520	0.00411845	0.0255777	0.0191662	1915/6279/6280/6282/1938	5
CC	GO:0099572	postsynaptic specialization	5/63	333/19520	0.00438999	0.0259009	0.0194084	4599/6208/6188/6232/6128	5
CC	GO:0098984	neuron to neuron synapse	5/63	342/19520	0.00491067	0.0275933	0.0206765	4599/6208/6188/6232/6128	5
MF	GO:0003735	structural constituent of ribosome	14/62	180/18337	8.92525e-16	1.63332e-13	1.27772e-13	6189/6187/6164/6233/6208/6134/6227/6157/6188/6224/6232/6128/6231/6181	14
MF	GO:0045182	translation regulator activity	5/62	138/18337	0.000102939	0.0076443	0.00598001	1915/5610/6208/6134/1938	5
MF	GO:0045296	cadherin binding	7/62	332/18337	0.000125316	0.0076443	0.00598001	6187/6164/6772/6282/1938/6128/6231	7
MF	GO:0050786	RAGE receptor binding	2/62	10/18337	0.000497416	0.0223931	0.0175178	6279/6280	2
MF	GO:0035325	Toll-like receptor binding	2/62	12/18337	0.000726369	0.0223931	0.0175178	6279/6280	2
MF	GO:0031386	protein tag	2/62	13/18337	0.000856568	0.0223931	0.0175178	9636/6233	2
MF	GO:0036041	long-chain fatty acid binding	2/62	13/18337	0.000856568	0.0223931	0.0175178	6279/6280	2
MF	GO:0019843	rRNA binding	3/62	64/18337	0.00132414	0.0302897	0.0236951	6208/1938/6188	3
MF	GO:0003746	translation elongation factor activity	2/62	19/18337	0.00185349	0.0376876	0.0294824	1915/1938	2
MF	GO:0003725	double-stranded RNA binding	3/62	76/18337	0.00217088	0.0397272	0.0310779	5610/4938/8638	3
MF	GO:0048306	calcium-dependent protein binding	3/62	84/18337	0.00288658	0.0451286	0.0353034	6279/6280/6282	3
MF	GO:0019865	immunoglobulin binding	2/62	24/18337	0.00295925	0.0451286	0.0353034	2207/3512	2
MF	GO:0048027	mRNA 5'-UTR binding	2/62	26/18337	0.00346952	0.0488401	0.0382068	6189/6208	2

## Sheet: natural killer cell_KEGG
ID	Description	GeneRatio	BgRatio	pvalue	p.adjust	qvalue	geneID	Count
hsa05171	Coronavirus disease - COVID-19	19/40	232/8105	1.75839e-19	1.44188e-17	1.31416e-17	9636/4599/6189/6187/6164/5610/6233/6772/6208/4938/6134/6227/6157/6188/6224/6232/6128/6231/6181	19
hsa03010	Ribosome	14/40	158/8105	9.60158e-15	3.93665e-13	3.58796e-13	6189/6187/6164/6233/6208/6134/6227/6157/6188/6224/6232/6128/6231/6181	14
hsa05162	Measles	6/40	139/8105	5.42501e-05	0.00148284	0.00135149	4599/3665/5610/6772/4938/3560	6
hsa05160	Hepatitis C	6/40	157/8105	0.000106888	0.00219121	0.00199713	4599/3665/5610/6772/4938/91543	6
hsa05164	Influenza A	6/40	172/8105	0.000176531	0.00289511	0.00263868	4599/3665/5610/6772/4938/91543	6
hsa05169	Epstein-Barr virus infection	5/40	202/8105	0.00296226	0.0404842	0.0368983	9636/3665/5610/6772/4938	5

## Sheet: Dendritic cell_GO
ONTOLOGY	ID	Description	GeneRatio	BgRatio	pvalue	p.adjust	qvalue	geneID	Count
BP	GO:0009615	response to virus	13/23	359/18862	3.33972e-17	8.72861e-15	6.49367e-15	8519/10964/3429/3669/4599/10410/6772/29800/10561/10581/9636/5610/54541	13
BP	GO:0051607	defense response to virus	44553	260/18862	4.31398e-17	8.72861e-15	6.49367e-15	8519/10964/3429/3669/4599/10410/6772/29800/10581/9636/5610/54541	12
BP	GO:0140546	defense response to symbiont	44553	260/18862	4.31398e-17	8.72861e-15	6.49367e-15	8519/10964/3429/3669/4599/10410/6772/29800/10581/9636/5610/54541	12
BP	GO:0048525	negative regulation of viral process	44462	89/18862	5.92328e-16	8.98857e-14	6.68707e-14	8519/3669/4599/10410/6772/4061/10581/9636/5610	9
BP	GO:0060337	type I interferon signaling pathway	44462	95/18862	1.09055e-15	1.21659e-13	9.05085e-14	8519/3429/3669/4599/10410/6772/54739/10581/9636	9
BP	GO:0071357	cellular response to type I interferon	44462	96/18862	1.20256e-15	1.21659e-13	9.05085e-14	8519/3429/3669/4599/10410/6772/54739/10581/9636	9
BP	GO:0034340	response to type I interferon	44462	101/18862	1.93046e-15	1.67398e-13	1.24536e-13	8519/3429/3669/4599/10410/6772/54739/10581/9636	9
BP	GO:0045071	negative regulation of viral genome replication	44400	54/18862	2.49052e-13	1.88968e-11	1.40583e-11	8519/3669/4599/10410/10581/9636/5610	7
BP	GO:0050792	regulation of viral process	44462	186/18862	5.26662e-13	3.55204e-11	2.64255e-11	8519/3669/4599/10410/6772/4061/10581/9636/5610	9
BP	GO:0043903	regulation of biological process involved in symbiotic interaction	44462	197/18862	8.86606e-13	5.3817e-11	4.00372e-11	8519/3669/4599/10410/6772/4061/10581/9636/5610	9
BP	GO:0019079	viral genome replication	44431	129/18862	1.72872e-12	9.5394e-11	7.09686e-11	8519/3429/3669/4599/10410/10581/9636/5610	8
BP	GO:1903900	regulation of viral life cycle	44431	148/18862	5.26979e-12	2.66564e-10	1.98311e-10	8519/3669/4599/10410/4061/10581/9636/5610	8
BP	GO:0045069	regulation of viral genome replication	44400	83/18862	5.71405e-12	2.66802e-10	1.98488e-10	8519/3669/4599/10410/10581/9636/5610	7
BP	GO:0019058	viral life cycle	44462	348/18862	1.45431e-10	6.30546e-09	4.69096e-09	8519/3429/3669/4599/10410/4061/10581/9636/5610	9
BP	GO:0035456	response to interferon-beta	44339	31/18862	2.8163e-10	1.13966e-08	8.47853e-09	8519/10410/6772/54739/10581	5
BP	GO:0046597	negative regulation of viral entry into host cell	44309	20/18862	8.03299e-09	3.04752e-07	2.26721e-07	8519/10410/4061/10581	4
BP	GO:0035455	response to interferon-alpha	44309	21/18862	9.91511e-09	3.54028e-07	2.6338e-07	8519/10410/10581/5610	4
BP	GO:1903901	negative regulation of viral life cycle	44309	24/18862	1.75611e-08	5.922e-07	4.40568e-07	8519/10410/4061/10581	4
BP	GO:0046596	regulation of viral entry into host cell	44309	41/18862	1.65085e-07	5.27404e-06	3.92363e-06	8519/10410/4061/10581	4
BP	GO:0052372	modulation by symbiont of entry into host	44309	48/18862	3.15408e-07	9.57264e-06	7.12159e-06	8519/10410/4061/10581	4
BP	GO:0034341	response to interferon-gamma	44339	197/18862	3.411e-06	9.85943e-05	7.33494e-05	8519/10410/6772/567/10581	5
BP	GO:0051701	biological process involved in interaction with host	44339	219/18862	5.71981e-06	0.000157815	0.000117407	8519/10410/4061/10581/5610	5
BP	GO:0046718	viral entry into host cell	44309	140/18862	2.30706e-05	0.000608864	0.000452966	8519/10410/4061/10581	4
BP	GO:0045646	regulation of erythrocyte differentiation	44278	47/18862	2.47966e-05	0.000627146	0.000466567	6772/567/9636	3
BP	GO:0044409	entry into host	44309	153/18862	3.2686e-05	0.000793615	0.000590412	8519/10410/4061/10581	4
BP	GO:0052126	movement in host environment	44309	175/18862	5.52336e-05	0.00128949	0.000959321	8519/10410/4061/10581	4
BP	GO:0030218	erythrocyte differentiation	44278	115/18862	0.000357706	0.00804177	0.00598269	6772/567/9636	3
BP	GO:0034101	erythrocyte homeostasis	44278	121/18862	0.00041523	0.00900159	0.00669675	6772/567/9636	3
BP	GO:0050690	regulation of defense response to virus by virus	44250	29/18862	0.000566008	0.0118471	0.0088137	567/5610	2
BP	GO:0002230	positive regulation of defense response to virus by host	44250	31/18862	0.0006473	0.013097	0.00974357	6772/29800	2
BP	GO:0045648	positive regulation of erythrocyte differentiation	44250	32/18862	0.000689941	0.0133536	0.00993446	6772/9636	2
BP	GO:0002262	myeloid cell homeostasis	44278	145/18862	0.00070398	0.0133536	0.00993446	6772/567/9636	3
BP	GO:0050691	regulation of defense response to virus by host	44250	41/18862	0.00113304	0.0208412	0.0155048	6772/29800	2
BP	GO:0006413	translational initiation	44278	193/18862	0.00160632	0.0286775	0.0213347	51386/6187/5610	3
BP	GO:0019080	viral gene expression	44278	198/18862	0.00172824	0.0299726	0.0222982	51386/10410/6187	3
MF	GO:0019865	immunoglobulin binding	44249	24/18337	0.000373225	0.0309777	0.0212149	2205/2217	2

## Sheet: Dendritic cell_KEGG
ID	Description	GeneRatio	BgRatio	pvalue	p.adjust	qvalue	geneID	Count
hsa05171	Coronavirus disease - COVID-19	44326	232/8105	4.12587e-06	0.000206294	0.000173721	4599/6772/6187/9636/5610	5
hsa05169	Epstein-Barr virus infection	44296	202/8105	6.99196e-05	0.00174799	0.00147199	6772/567/9636/5610	4
hsa05165	Human papillomavirus infection	44296	331/8105	0.000471725	0.00677922	0.00570882	4599/6772/9636/5610	4
hsa05162	Measles	44265	139/8105	0.000542337	0.00677922	0.00570882	4599/6772/5610	3
hsa05160	Hepatitis C	44265	157/8105	0.00077429	0.0077429	0.00652034	4599/6772/5610	3
hsa05164	Influenza A	44265	172/8105	0.00100986	0.0084155	0.00708674	4599/6772/5610	3

[truncated: 2 more sheets: monocyte_GO, monocyte_KEGG]
